# Supplementary material for: Accuracy of non-invasive prenatal testing using cell-free DNA for detection of Down, Edwards and Patau syndromes: a systematic review and meta-analysis
Source: HighWire-hosted journal article supplement (doi:10.1136/bmjopen-2015-010002), 2016-01-01
Supplement: bmjopen-2015-010002supp5.pdf [file bmjopen-2015-010002supp5.pdf]

**Supplement 5 Table of study characteristics of included studies**

| Reference                                                          | Study design                                                                                                                                                                        | Participants                                                                                                                                                                                                                                                                           | Exclusions from study                                                             | Trisomies investigated (T21, T18, T13) | Prior risk                                                                                                                                                      | Type of test                                                                                       | Reference method                          | Comparator if applicable | Primary / secondary outcome                                        | Accuracy of NIPT or comparison of NIPT with CT |
|--------------------------------------------------------------------|-------------------------------------------------------------------------------------------------------------------------------------------------------------------------------------|----------------------------------------------------------------------------------------------------------------------------------------------------------------------------------------------------------------------------------------------------------------------------------------|-----------------------------------------------------------------------------------|----------------------------------------|-----------------------------------------------------------------------------------------------------------------------------------------------------------------|----------------------------------------------------------------------------------------------------|-------------------------------------------|--------------------------|--------------------------------------------------------------------|------------------------------------------------|
| Alberti 2015[56]<br><br>France<br><br>Study start date: March 2010 | Prospective case-control<br><br>(cases with abnormal karyotype matched with a balanced number of randomly selected pregnancies with euploid karyotypes)<br><br>Number of centres: 3 | N=976 enrolled in cohort.<br><br>Women with singleton pregnancies, high-risk of foetal T21.<br><br>N=225 in case-control for sequencing.<br><br>Mean age (SD): 35.2 (6.7) years.<br><br>Mean gestational age (SD): 14 (2) weeks.<br><br>1 <sup>st</sup> and 2 <sup>nd</sup> trimester. | N=0 from cohort.<br><br>N=751 (76.9%):<br><br>Not included in case-control study. | T21                                    | All high risk for foetal T21 (>1:250) based on the combination of maternal age with ultrasound and maternal serum markers during the first or second trimester. | MPS (whole genome)<br><br>performed in a cytogenetics laboratory in a university teaching hospital | CVS or amniocentesis and foetal karyotype | None                     | NIPT performance for T21 detection.                                | Accuracy of NIPT                               |
| Ashoor 2012[46]<br><br>UK                                          | Nested case-control of stored maternal                                                                                                                                              | N=400<br><br>(50 T21, 50 T18, 300 euploid)                                                                                                                                                                                                                                             | Pregnant by IVF or multiple pregnancy                                             | T21, T18                               | All high risk:<br><br>Combined 1st trimester screen                                                                                                             | DANSR, FORTE                                                                                       | Karyotyping after CVS                     | None                     | FORTE risk score for aneuploidies, sensitivity and specificity for | Accuracy of NIPT                               |

| Reference                                            | Study design                                                                                                                 | Participants                                                                                                                                                                                                                            | Exclusions from study                 | Trisomies investigated (T21, T18, T13) | Prior risk                                                                    | Type of test                                         | Reference method                                         | Comparator if applicable | Primary / secondary outcome                      | Accuracy of NIPT or comparison of NIPT with CT |
|------------------------------------------------------|------------------------------------------------------------------------------------------------------------------------------|-----------------------------------------------------------------------------------------------------------------------------------------------------------------------------------------------------------------------------------------|---------------------------------------|----------------------------------------|-------------------------------------------------------------------------------|------------------------------------------------------|----------------------------------------------------------|--------------------------|--------------------------------------------------|------------------------------------------------|
| Study start date: NR                                 | <p>samples:</p> <p>Controls matched with T21/T18 cases for sample storage time in 3:1 ratio.</p> <p>Number of centres: 1</p> | <p>Singleton pregnancies, high-risk women.</p> <p>1<sup>st</sup> trimester 100%;</p> <p>All 11-13 weeks' gestation.</p> <p>Ethnicity:</p> <p>White 89%,</p> <p>'Afro Caribbean' 5%,</p> <p>South/ East Asian 6%,</p> <p>Mixed 0.5%.</p> | N=NR                                  |                                        | risk >1:300                                                                   | Aria Diagnostics (USA)                               |                                                          |                          | detection of T21 and T18                         |                                                |
| <p>Beamon 2014[36]</p> <p>USA</p> <p>Study start</p> | <p>Prospective cohort</p> <p>Number of centres: 1</p>                                                                        | <p>N=208</p> <p>High-risk pregnancies who chose NIPT as triage test, singleton or dichorionic twin gestations, ≥10</p>                                                                                                                  | <p>Multiple pregnancy</p> <p>N=NR</p> | T21, T18, T13                          | <p>All high-risk:</p> <p>AMA: 148 (71.2%),</p> <p>AMA alone: 121 (58.2%),</p> | <p>MPS (whole genome)</p> <p>Sequenom Center for</p> | <p>Karyotyping after amniocentesis, cordocentesis or</p> | None                     | Test performance for T13, T18 and T21 detection. | Accuracy of NIPT                               |

| Reference          | Study design | Participants                                                                                                                                                                                                                                                                 | Exclusions from study | Trisomies investigated (T21, T18, T13) | Prior risk                                                                                                                                                                                                                                                                                                                                     | Type of test                                                                           | Reference method                 | Comparator if applicable | Primary / secondary outcome | Accuracy of NIPT or comparison of NIPT with CT |
|--------------------|--------------|------------------------------------------------------------------------------------------------------------------------------------------------------------------------------------------------------------------------------------------------------------------------------|-----------------------|----------------------------------------|------------------------------------------------------------------------------------------------------------------------------------------------------------------------------------------------------------------------------------------------------------------------------------------------------------------------------------------------|----------------------------------------------------------------------------------------|----------------------------------|--------------------------|-----------------------------|------------------------------------------------|
| date: January 2012 |              | weeks' gestation.<br><br>Mean age (SD), range: 36 (5.5),<br><br>19-47 years.<br><br>Mean gestational age (SD), range: 15.6 (4.3), 10-34 weeks.<br><br>Trimester:<br><br>1 <sup>st</sup> : 111 (53.4%),<br><br>2 <sup>nd</sup> : 95 (45.7%),<br><br>3 <sup>rd</sup> : 2 (1%). |                       |                                        | AMA + other: 27 (13.0%),<br><br>Ultrasound abnormality: 26 (12.5%),<br><br>Abnormal serum screen: 29 (13.9%),<br><br>Combined FTS: 16 (7.7%),<br><br>Quadruple: 12 (5.8%),<br><br>Integrated: 1 (0.5%),<br><br>Affected family member: 3 (1.4%),<br><br>Other: 2 (1.0%),<br><br>Twins (growth discordance): 1 (0.5%),<br><br>Maternal anxiety: | Molecular Medicine (USA) (n=163, 78.4%) or<br><br>Verinata Health (USA) (n=45, 21.6%). | CVS,<br><br>phenotype of newborn |                          |                             |                                                |

| Reference                                                                       | Study design                                                                        | Participants                                                                                                                                                                    | Exclusions from study                                                                                                           | Trisomies investigated (T21, T18, T13) | Prior risk                                                                                                                                                                                                          | Type of test                                                              | Reference method                                                                         | Comparator if applicable | Primary / secondary outcome                                                                                                                | Accuracy of NIPT or comparison of NIPT with CT |
|---------------------------------------------------------------------------------|-------------------------------------------------------------------------------------|---------------------------------------------------------------------------------------------------------------------------------------------------------------------------------|---------------------------------------------------------------------------------------------------------------------------------|----------------------------------------|---------------------------------------------------------------------------------------------------------------------------------------------------------------------------------------------------------------------|---------------------------------------------------------------------------|------------------------------------------------------------------------------------------|--------------------------|--------------------------------------------------------------------------------------------------------------------------------------------|------------------------------------------------|
|                                                                                 |                                                                                     |                                                                                                                                                                                 |                                                                                                                                 |                                        | 1 (0.5%).                                                                                                                                                                                                           |                                                                           |                                                                                          |                          |                                                                                                                                            |                                                |
| Bevilacqua 2015[37]<br><br>Belgium, UK, Spain<br><br>Study start date: May 2013 | Prospective multicentre cohort<br><br>Number of centres: NR                         | N=515 included.<br><br>Twin pregnancies at mixed risk for aneuploidies.<br><br>Median gestational age (range): 13.0 (10.0-28.0) weeks.<br><br>1 <sup>st</sup> trimester: 68.5%. | Criteria for exclusion from study NR                                                                                            | T21, T18, T13                          | Mixed risk:<br><br>High risk for foetal trisomy by 1 <sup>st</sup> -trimester combined test or 2 <sup>nd</sup> -trimester triple/quadruple test or ultrasound<br><br>or<br><br>NIPT as primary method of screening. | DANSR, FORTE<br><br>Harmony Prenatal test<br><br>Ariosa Diagnostics (USA) | Karyotyping after amniocentesis, cordocentesis or CVS, or newborn phenotypic examination | None                     | 1) Factors influencing failure rate in twin and singleton pregnancies.<br><br>2) NIPT performance for T13, T18 and T21 detection in twins. | Accuracy of NIPT                               |
| Bianchi 2012[47]<br><br>USA<br><br>Study start date: NR                         | Nested case-control<br><br>Controls unmatched in 4:1 ratio<br><br>(Part of MELISSA) | N=2,882 in cohort.<br><br>N=534 in nested case-control study.<br><br>Singleton pregnancies, high risk.                                                                          | 257/2,882 (8.9%) from MELISSA cohort:<br><br>85 multiple pregnancies,<br><br>45 no karyotype information,<br><br>127 ineligible | T21, T18, T13                          | All high risk:<br><br>AMA (>38 years) only 152 (28.5%);<br><br>Positive screen risk 91 (17.0%);<br><br>Ultrasound abnormality                                                                                       | MPS (whole genome)<br><br>Verinata-Illumina (USA)                         | Karyotyping after CVS                                                                    | None                     | 1) MPS performance (sensitivity and specificity) for T21, T18 and T13 detection.                                                           | Accuracy of NIPT                               |

| Reference | Study design                                             | Participants                                                                                                                                                                                                                                                                                                                                                | Exclusions from study | Trisomies investigated (T21, T18, T13) | Prior risk                                                                                                   | Type of test | Reference method | Comparator if applicable | Primary / secondary outcome                                | Accuracy of NIPT or comparison of NIPT with CT |
|-----------|----------------------------------------------------------|-------------------------------------------------------------------------------------------------------------------------------------------------------------------------------------------------------------------------------------------------------------------------------------------------------------------------------------------------------------|-----------------------|----------------------------------------|--------------------------------------------------------------------------------------------------------------|--------------|------------------|--------------------------|------------------------------------------------------------|------------------------------------------------|
|           | prospective cohort.<br><br>Number of centres: 53 (of 60) | Mean age (SD), range: 35.2 (6.40),<br><br>18 – 46 years.<br><br>Mean gestational age (SD), range:<br><br>15.1 (3.16),<br><br>10 – 23 weeks.<br><br>Trimester:<br><br>1 <sup>st</sup> : 165 (30.9%),<br><br>2 <sup>nd</sup> : 369 (69.1%).<br><br>Ethnicity:<br><br>White 72.7%,<br><br>African American 10.9%,<br><br>Asian 9.9%,<br><br>Native American or | blood sample.         |                                        | 122 (22.8%);<br><br>Prior aneuploidy pregnancy<br><br>15 (2.8%);<br><br>More than 1 risk<br><br>154 (28.9%). |              |                  |                          | 2) Sex chromosome classification and Monosomy X detection. |                                                |

| Reference                                                         | Study design                                    | Participants                                                                                                                                                                                                                                                                                                                    | Exclusions from study                                                                                                                                | Trisomies investigated (T21, T18, T13) | Prior risk                                                                            | Type of test                                                    | Reference method                                                  | Comparator if applicable                                                                                                                                                                                                                                      | Primary / secondary outcome                                                                                                                                                                                                               | Accuracy of NIPT or comparison of NIPT with CT |
|-------------------------------------------------------------------|-------------------------------------------------|---------------------------------------------------------------------------------------------------------------------------------------------------------------------------------------------------------------------------------------------------------------------------------------------------------------------------------|------------------------------------------------------------------------------------------------------------------------------------------------------|----------------------------------------|---------------------------------------------------------------------------------------|-----------------------------------------------------------------|-------------------------------------------------------------------|---------------------------------------------------------------------------------------------------------------------------------------------------------------------------------------------------------------------------------------------------------------|-------------------------------------------------------------------------------------------------------------------------------------------------------------------------------------------------------------------------------------------|------------------------------------------------|
|                                                                   |                                                 | Alaska Native 0.9%,<br>Multiracial 5.6%.                                                                                                                                                                                                                                                                                        |                                                                                                                                                      |                                        |                                                                                       |                                                                 |                                                                   |                                                                                                                                                                                                                                                               |                                                                                                                                                                                                                                           |                                                |
| Bianchi 2014[19]<br><br>USA<br><br>Study start date:<br>July 2012 | Prospective cohort<br><br>Number of centres: 21 | N=2,052 enrolled.<br><br>N=2,042 eligible.<br><br>Singleton pregnancies, general obstetric population.<br><br>Trimester:<br><br>1 <sup>st</sup> : 759 (39.7%),<br><br>2 <sup>nd</sup> : 610 (31.9%),<br><br>3 <sup>rd</sup> : 545 (28.5%).<br><br>Mean gestational age (SD), range:<br><br>20.3 (8.6),<br><br>8.0 – 39.4 weeks. | N=10 (0.5%):<br><br>7 insufficient blood volume,<br><br>1 late receipt of blood sample,<br><br>1 maternal age <18 years,<br><br>1 withdrawn consent. | T21, T18, T13                          | General obstetric population undergoing standard<br><br>prenatal aneuploidy screening | MPS (whole genome)<br><br>Verifi<br><br>Verinata-Illumina (USA) | Newborn phenotype<br><br>(97.0%)<br>or<br><br>Karyotyping (3.0%). | Standard prenatal aneuploidy screening produced by accredited clinical laboratories.<br><br>Cutoff values as used by individual laboratories<br><br><br><br>1 <sup>st</sup> -trimester: Combined test<br><br>(PAPP-A, $\beta$ -hCG, NT)<br><br>N=739 (38.6%). | 1)<br><br>Comparison of false positive rates of NIPT with conventional screening for T21 and T18.<br><br>2)<br><br>Comparison of false positive rates for T13.<br><br>Comparison of foetal fractions in low-risk with high-risk patients. | Comparison of NIPT with CT                     |

| Reference                       | Study design                       | Participants                                                                                                     | Exclusions from study | Trisomies investigated (T21, T18, T13) | Prior risk                                                     | Type of test       | Reference method                   | Comparator if applicable                                                                                                                                                                                                                                                                                                                                                                                                          | Primary / secondary outcome                   | Accuracy of NIPT or comparison of NIPT with CT |
|---------------------------------|------------------------------------|------------------------------------------------------------------------------------------------------------------|-----------------------|----------------------------------------|----------------------------------------------------------------|--------------------|------------------------------------|-----------------------------------------------------------------------------------------------------------------------------------------------------------------------------------------------------------------------------------------------------------------------------------------------------------------------------------------------------------------------------------------------------------------------------------|-----------------------------------------------|------------------------------------------------|
|                                 |                                    | <p>Mean age (SD), range:</p> <p>29.6 (5.54),</p> <p>18.0 – 48.6 years.</p> <p>Assisted conception 66 (3.4%).</p> |                       |                                        |                                                                |                    |                                    | <p>2<sup>nd</sup>-trimester:</p> <p>Quadruple</p> <p>(MS-AFP, <math>\beta</math>-hCG, estriol and inhibin A)</p> <p>N=439 (22.9%);</p> <p>Quadruple + combined test</p> <p>N= 53 (2.8%);</p> <p>Quadruple + 1<sup>st</sup>-trimester serum markers only</p> <p>N=164 (8.6%);</p> <p>Sequential:</p> <p>1<sup>st</sup>-trimester screen results reported before final report in 2<sup>nd</sup> trimester</p> <p>N=519 (27.1%).</p> |                                               |                                                |
| Chen 2011[48]<br><br>Hong Kong, | Case-control of stored samples and | N=392<br><br>(N=140 archived plasma samples with                                                                 | NR                    | T18, T13                               | All high risk based on clinical indicators as per the existing | MPS (whole genome) | Karyotyping after CVS or amniocent | None                                                                                                                                                                                                                                                                                                                                                                                                                              | Diagnostic performance of MPS for T13 and T18 | Accuracy of NIPT                               |

| Reference                                                                               | Study design                                                                      | Participants                                                                                                                                                                                                                                   | Exclusions from study                                                                                 | Trisomies investigated (T21, T18, T13) | Prior risk                                                                                           | Type of test                             | Reference method                                                | Comparator if applicable | Primary / secondary outcome                                       | Accuracy of NIPT or comparison of NIPT with CT |
|-----------------------------------------------------------------------------------------|-----------------------------------------------------------------------------------|------------------------------------------------------------------------------------------------------------------------------------------------------------------------------------------------------------------------------------------------|-------------------------------------------------------------------------------------------------------|----------------------------------------|------------------------------------------------------------------------------------------------------|------------------------------------------|-----------------------------------------------------------------|--------------------------|-------------------------------------------------------------------|------------------------------------------------|
| UK, Netherlands, China<br><br>Study start date: NR                                      | prospectively recruited women<br><br>Number of centres: 10                        | and without aneuploidy matched for gestational age;<br><br>N=252 prospectively recruited.)<br><br>344/392 samples analysed in a previous study [49],<br><br>48 cases newly recruited.<br><br>Singleton pregnancy undergoing CVS/amniocentesis. |                                                                                                       |                                        | obstetric practice of each recruitment unit.                                                         | Sequenom (USA)                           | esis                                                            |                          | detection.                                                        |                                                |
| Chiu 2011[49]<br><br>Hong Kong, UK, Netherlands, China<br><br>Study start date: October | Case-control of stored samples and prospectively recruited women<br><br>Number of | N=824 screened (N=248 archived T21 and non-T21 samples matched for gestational ages in 1:5 ratio and<br><br>N=576 prospectively collected high-risk                                                                                            | N=60 (7.3%):<br><br>14 failed recruitment criteria<br><br>(2 twin pregnancies,<br><br>12 without full | T21                                    | High risk by conventional screening (>1:300):<br><br>582 (77%),<br><br>Median risk for T21: 1 in 43. | MPS (whole genome)<br><br>Sequenom (USA) | Full karyotyping after amniocentesis (18%) or<br><br>CVS (82%). | None                     | Diagnostic sensitivity, specificity, PPV & NPV for T21 detection. | Accuracy of NIPT                               |



| Reference                                                    | Study design                                   | Participants                                                                                                                                                                    | Exclusions from study                                                                                                                                                                                                                 | Trisomies investigated (T21, T18, T13) | Prior risk                                                                                                                                                                                                          | Type of test                                                          | Reference method                                      | Comparator if applicable | Primary / secondary outcome                                          | Accuracy of NIPT or comparison of NIPT with CT |
|--------------------------------------------------------------|------------------------------------------------|---------------------------------------------------------------------------------------------------------------------------------------------------------------------------------|---------------------------------------------------------------------------------------------------------------------------------------------------------------------------------------------------------------------------------------|----------------------------------------|---------------------------------------------------------------------------------------------------------------------------------------------------------------------------------------------------------------------|-----------------------------------------------------------------------|-------------------------------------------------------|--------------------------|----------------------------------------------------------------------|------------------------------------------------|
| 2008                                                         | centres: 10                                    | samples),<br><br>N=764 included.<br><br>Singleton pregnancies.<br><br>Median age: 35.4 years.<br><br>Median gestational age: 13+1 weeks.<br><br>1 <sup>st</sup> trimester: 74%. | karyotyping);<br><br>46 compromised blood sample<br><br>(3 samples collected after invasive obstetric procedure,<br><br>2 delayed blood processing,<br><br>3 with ambiguous information,<br><br>12 haemolysed, 26 inadequate volume). |                                        | Intermediate risk by conventional screening (1:300-1:1000) 39 (5%),<br><br>Median risk for T21: 1 in 502.<br><br>Other indications (previous T21 pregnancy, ultrasound abnormalities, risk for monogenic diseases). |                                                                       |                                                       |                          |                                                                      |                                                |
| Comas 2014[38]<br><br>Spain<br><br>Study start date: January | Prospective cohort<br><br>Number of centres: 1 | N=333<br><br>Singleton pregnancies who chose to have NIPT.<br><br>Mean maternal age                                                                                             | Multiple pregnancies, ultrasound anomalies or high risk of congenital malformation<br><br>N=NR                                                                                                                                        | T21, T18, T13                          | Routine general population in a real clinical setting.<br><br>83.5% Low-risk by conventional                                                                                                                        | DANSR FORTE<br><br>(Harmony Prenatal Test),<br><br>Ariosa Diagnostics | Invasive testing and karyotyping or newborn phenotype | None                     | 1) NIPT test performance for T13, T18, and T21.<br><br>2) Comparison | Accuracy of NIPT                               |

| Reference                                                                           | Study design                                                    | Participants                                                                                                                                                      | Exclusions from study                                                                        | Trisomies investigated (T21, T18, T13) | Prior risk                                                                                                                                                 | Type of test                                                                                     | Reference method                                                     | Comparator if applicable | Primary / secondary outcome                                                                               | Accuracy of NIPT or comparison of NIPT with CT |
|-------------------------------------------------------------------------------------|-----------------------------------------------------------------|-------------------------------------------------------------------------------------------------------------------------------------------------------------------|----------------------------------------------------------------------------------------------|----------------------------------------|------------------------------------------------------------------------------------------------------------------------------------------------------------|--------------------------------------------------------------------------------------------------|----------------------------------------------------------------------|--------------------------|-----------------------------------------------------------------------------------------------------------|------------------------------------------------|
| 2013                                                                                |                                                                 | (range): 37 (21-46) years.<br><br>Mean gestational age (range):<br>14.6 (9.5-23.5) weeks.<br><br>1 <sup>st</sup> and 2 <sup>nd</sup> trimester.                   |                                                                                              |                                        | screenings but unable to alleviate their anxiety.<br><br>16.5% High-risk from CT or referred for AMA with no prior screening.                              | (USA) (n=120, 36.0%) or<br><br>SNP- and NATUS (Panorama)<br><br>Natera Inc. (USA) (n=213, 64.0%) |                                                                      |                          | of Harmony and Panorama tests, factors influencing foetal fraction.                                       |                                                |
| Dan 2012[63]<br><br>China<br><br><br>Study start date: 1 <sup>st</sup> quarter 2010 | Prospective multicentre cohort<br><br><br>Number of centres: 49 | N=11,263 recruited.<br>N=11,184 included.<br><br>Singleton pregnancies, ≥ 18 years, gestational age of 9 - 28 weeks.<br><br>Median age (range): 31 (18-49) years. | N=79 (0.7%):<br>55 unqualified gestational age, 14 multiple pregnancies,<br>10 foetal death. | T21, T18                               | Mixed risk factors<br><br>Conventional T21 screening test:<br><br>yes - positive: 4,522 (40.7%)<br><br>yes - negative: 2,426 (21.8%)<br><br>No – with 1 or | MPS (whole genome)<br><br>BGI-Shenzen (China)                                                    | Full karyotyping 3,000 (26.6%) or birth questionnaire 4,524 (40.2%). | None                     | 1)<br>Sensitivity and specificity of MPS for T21 and T18 screening.<br><br>2) Workflow of MPS-based test. | Accuracy of NIPT                               |

| Reference                                                | Study design                                                   | Participants                                                                                                                                                                                                                                                                                           | Exclusions from study                    | Trisomies investigated (T21, T18, T13) | Prior risk                                                                                                                                                                                              | Type of test                      | Reference method    | Comparator if applicable | Primary / secondary outcome                          | Accuracy of NIPT or comparison of NIPT with CT |
|----------------------------------------------------------|----------------------------------------------------------------|--------------------------------------------------------------------------------------------------------------------------------------------------------------------------------------------------------------------------------------------------------------------------------------------------------|------------------------------------------|----------------------------------------|---------------------------------------------------------------------------------------------------------------------------------------------------------------------------------------------------------|-----------------------------------|---------------------|--------------------------|------------------------------------------------------|------------------------------------------------|
|                                                          |                                                                | <p>Median gestational age (range):</p> <p>20 (9-28) weeks.</p> <p>2<sup>nd</sup> trimester: &gt;74%.</p> <p>42/49 centres offered test to high-risk pregnant women identified by a conventional T21 screening test,</p> <p>7/49 centres enrolled participants regardless of prior risk assessment.</p> |                                          |                                        | <p>more other risk factors (<math>\geq 35</math> years, family history of aneuploidies, ultrasound abnormalities):</p> <p>2,770 (24.9%)</p> <p>No – without any risk factors:</p> <p>1,387 (12.5%).</p> |                                   |                     |                          |                                                      |                                                |
| <p>Del Mar Gil 2014[21]</p> <p>UK</p> <p>Study start</p> | <p>Retrospective cohort of stored samples</p> <p>Number of</p> | <p>N=207</p> <p>Twin pregnancies undergoing first-trimester screening for trisomies by combined test.</p>                                                                                                                                                                                              | <p>Singleton pregnancies</p> <p>N=NR</p> | T21, T18, T13                          | NR                                                                                                                                                                                                      | <p>DANSR FORTE</p> <p>Harmony</p> | Known birth outcome | None                     | Performance of Harmony Test in twin pregnancies only | Accuracy of NIPT                               |

| Reference               | Study design                    | Participants                                                                                                                                                                                                                                  | Exclusions from study | Trisomies investigated (T21, T18, T13) | Prior risk                                | Type of test             | Reference method                 | Comparator if applicable | Primary / secondary outcome                | Accuracy of NIPT or comparison of NIPT with CT |
|-------------------------|---------------------------------|-----------------------------------------------------------------------------------------------------------------------------------------------------------------------------------------------------------------------------------------------|-----------------------|----------------------------------------|-------------------------------------------|--------------------------|----------------------------------|--------------------------|--------------------------------------------|------------------------------------------------|
| date: NR                | centres: 1                      | <p>Age range: 26 – 41 years.</p> <p>Gestational age, range: 11 - 13 weeks.</p> <p>1<sup>st</sup> trimester: 100%.</p> <p>Ethnicity:</p> <p>Caucasian 70.0%,</p> <p>Afro-Caribbean 23.7%,</p> <p>South/East Asian 1.0%,</p> <p>Mixed 5.3%.</p> |                       |                                        |                                           | Ariosa Diagnostics (USA) |                                  |                          |                                            |                                                |
| Dhallan 2007[57]<br>USA | Prospective observational study | <p>N=60</p> <p>Women ≥ 18 years, singleton pregnancy.</p>                                                                                                                                                                                     | N=NR                  | T21                                    | Mostly high risk. Definition unspecified. | SNP allelic ratio        | Amniocentesis or newborn reports | None                     | Performance of SNP method in detecting T21 | Accuracy of NIPT                               |

| Reference                                                    | Study design                                                                                         | Participants                                                                                                                                                                                                                                                                   | Exclusions from study                                                                                                              | Trisomies investigated (T21, T18, T13) | Prior risk                                                                                                                                                                                | Type of test                             | Reference method                                                                             | Comparator if applicable | Primary / secondary outcome | Accuracy of NIPT or comparison of NIPT with CT |
|--------------------------------------------------------------|------------------------------------------------------------------------------------------------------|--------------------------------------------------------------------------------------------------------------------------------------------------------------------------------------------------------------------------------------------------------------------------------|------------------------------------------------------------------------------------------------------------------------------------|----------------------------------------|-------------------------------------------------------------------------------------------------------------------------------------------------------------------------------------------|------------------------------------------|----------------------------------------------------------------------------------------------|--------------------------|-----------------------------|------------------------------------------------|
| Study start date: January 2004                               | Number of centres: 10                                                                                | Mean age (range): 32.8 (18-43* years,<br><br>Mean gestational age (range): 19+6<br><br>(8+1 - 38+6) weeks,<br><br>1 <sup>st</sup> trimester: 8 (13%).                                                                                                                          |                                                                                                                                    |                                        |                                                                                                                                                                                           | Ravgen Inc. (USA)                        |                                                                                              |                          |                             |                                                |
| Ehrich 2011[50]<br><br>USA<br><br>Study start date: May 2009 | Prospective case-control<br><br>(T21 matched 1:11 with euploid samples)<br><br>Number of centres: NR | N=480 requested from independent 3 <sup>rd</sup> -party database.<br><br>Pregnancies at increased risk for foetal aneuploidies with scheduled invasive diagnostic procedure (unclear if singleton or also multiple pregnancies).<br><br>Median age (range): 37 (18 -47) years. | N=13 (2.7%):<br><br>9 sample volume <3.5 ml,<br><br>1 dropped,<br><br>2 mixed together,<br><br>1 tube broke during centrifugation. | T21                                    | High risk:<br><br>Positive serum screening 30.2%,<br><br>AMA $\geq$ 35 years 68.3%,<br><br>Ultrasound abnormality 12.9%,<br><br>Positive family history 5.2%,<br><br>Not specified 10.2%. | MPS (whole genome)<br><br>Sequenom (USA) | Amniocentesis (81%) or CVS (19%) and karyotype (60%), FISH (3%), both (36%) or QF-PCR (1.6%) | None                     | Test performance for T21    | Accuracy of NIPT                               |

| Reference                                                    | Study design                                                                                                                                  | Participants                                                                                                                                                                                                                  | Exclusions from study                                            | Trisomies investigated (T21, T18, T13) | Prior risk                                                                                                               | Type of test                            | Reference method                                                                               | Comparator if applicable | Primary / secondary outcome                                                                        | Accuracy of NIPT or comparison of NIPT with CT |
|--------------------------------------------------------------|-----------------------------------------------------------------------------------------------------------------------------------------------|-------------------------------------------------------------------------------------------------------------------------------------------------------------------------------------------------------------------------------|------------------------------------------------------------------|----------------------------------------|--------------------------------------------------------------------------------------------------------------------------|-----------------------------------------|------------------------------------------------------------------------------------------------|--------------------------|----------------------------------------------------------------------------------------------------|------------------------------------------------|
|                                                              |                                                                                                                                               | Median gestational age (range): 16 (8-36) weeks.                                                                                                                                                                              |                                                                  |                                        |                                                                                                                          |                                         |                                                                                                |                          |                                                                                                    |                                                |
| Hall 2014[51]<br><br>USA<br><br>Study start date: March 2012 | Nested case-control<br><br>(selected from a cohort of >1000 women, all T13 cases matched 1:3 on gestational age)<br><br>Number of centres: NR | N=68<br><br>(17 T13, 51 euploid)<br><br>High-risk pregnancy couples, women $\geq 18$ years, singleton pregnancy.<br><br>Median gestational age (range): 16.0 (12.1-22.7) weeks,<br><br>1 <sup>st</sup> trimester: 23 (35.9%). | N=1/>1,000 (<0.1%) from cohort:<br><br>1 known foetal mosaicism. | T13                                    | High-risk for foetal aneuploidy (positive serum screen, ultrasound abnormality or maternal age of greater than 35 years) | SNP- and NATUS<br><br>Natera Inc. (USA) | CVS, amniocentesis or genetic testing of cord blood, buccal, saliva, or products of conception | None                     | 1) Test performance for T13 detection.<br><br>2) Specificity of T18, T21 and Monosomy X detection. | Accuracy of NIPT                               |
| Huang 2014[22]<br><br>China (Denmark,                        | Prospective, multicentre cohort                                                                                                               | N=189<br><br>Twin pregnancies requiring invasive procedure (CVS/                                                                                                                                                              | N=NR<br><br>Intrauterine death, without                          | T21, T18                               | All high risk<br><br>Threshold and                                                                                       | MPS (whole genome)                      | Full karyotyping from CVS                                                                      | None                     | Test performance for T18 and T21 detection in twin                                                 | Accuracy of NIPT                               |

| Reference                                                                   | Study design                                   | Participants                                                                                                                                                                                       | Exclusions from study | Trisomies investigated (T21, T18, T13) | Prior risk                                                                                                                                                 | Type of test                                       | Reference method                                       | Comparator if applicable | Primary / secondary outcome                                             | Accuracy of NIPT or comparison of NIPT with CT |
|-----------------------------------------------------------------------------|------------------------------------------------|----------------------------------------------------------------------------------------------------------------------------------------------------------------------------------------------------|-----------------------|----------------------------------------|------------------------------------------------------------------------------------------------------------------------------------------------------------|----------------------------------------------------|--------------------------------------------------------|--------------------------|-------------------------------------------------------------------------|------------------------------------------------|
| Hong Kong)<br><br>Study start date: NR                                      | Number of centres: 7                           | amniocentesis)<br><br>Median age (range): 31 (22-44) years.<br><br>Median gestational age (range): 19 (11-36) weeks.<br><br>1 <sup>st</sup> trimester: ≥ 2.1%,<br>2 <sup>nd</sup> trimester: ≥ 74% | foetal karyotype      |                                        | risk establishment NR                                                                                                                                      | NIFTY test<br><br>BGI-Shenzen (China)              | (2.1%), amniocentesis (94.2%), or cordocentesis (3.7%) |                          | pregnancies                                                             |                                                |
| Jeon 2014[39]<br><br>South Korea, China<br><br>Study start date: March 2012 | Prospective cohort<br><br>Number of centres: 1 | N=155<br><br>High-risk women scheduled for amniocentesis, ≥ 19 years old, singleton pregnancy with a gestational age of ≥ 12 weeks.<br><br>Mean age (SD),                                          | NR                    | T21, T18                               | High risk of foetal defects by standard aneuploidy screening with individual risk scores and interpretations produced by accredited clinical laboratories. | MPS (whole genome)<br><br>Semiconductor sequencing | Amniocentesis and foetal karyotyping                   | None                     | T18 and T21 detection by semiconductor sequencer Ion Proton (PPV, NPV). | Accuracy of NIPT                               |

| Reference                                                      | Study design                                   | Participants                                                                                                                                 | Exclusions from study                     | Trisomies investigated (T21, T18, T13) | Prior risk                                                                                           | Type of test                                   | Reference method                    | Comparator if applicable | Primary / secondary outcome                                                                                                     | Accuracy of NIPT or comparison of NIPT with CT |
|----------------------------------------------------------------|------------------------------------------------|----------------------------------------------------------------------------------------------------------------------------------------------|-------------------------------------------|----------------------------------------|------------------------------------------------------------------------------------------------------|------------------------------------------------|-------------------------------------|--------------------------|---------------------------------------------------------------------------------------------------------------------------------|------------------------------------------------|
|                                                                |                                                | range: 30.73 (4.99), 19-43 years.<br><br>Trimester:<br><br>1 <sup>st</sup> : <18.1%,<br><br>2 <sup>nd</sup> : >55.5%.                        |                                           |                                        |                                                                                                      |                                                |                                     |                          |                                                                                                                                 |                                                |
| Jiang 2012[23]<br><br>China<br><br>Study start date: June 2009 | Prospective cohort<br><br>Number of centres: 3 | N=903<br><br>Inclusion criteria NR<br><br>Age range:<br><br>20-45 years.<br><br>Gestational age:<br><br>10-34 weeks<br><br>(all trimesters). | Criteria NR<br><br>No exclusions recorded | T21, T18<br>T13                        | Prevalence of aneuploidy suggests a general obstetric population but all women had invasive testing. | MPS (whole genome)<br><br>BGI-Shenzhen (China) | Full karyotyping from amniocentesis | None                     | 1) Aneuploidy detection.<br><br>2) GC content and sequencing bias.<br><br>Relation between foetal fraction and gestational age. | Accuracy of NIPT                               |



| Reference                                                       | Study design                                                             | Participants                                                                                                                                                                                                                                                                       | Exclusions from study                                                                                                                                                                   | Trisomies investigated (T21, T18, T13) | Prior risk                                                                                                                                              | Type of test                                           | Reference method                                                                                                                         | Comparator if applicable | Primary / secondary outcome                                                      | Accuracy of NIPT or comparison of NIPT with CT |
|-----------------------------------------------------------------|--------------------------------------------------------------------------|------------------------------------------------------------------------------------------------------------------------------------------------------------------------------------------------------------------------------------------------------------------------------------|-----------------------------------------------------------------------------------------------------------------------------------------------------------------------------------------|----------------------------------------|---------------------------------------------------------------------------------------------------------------------------------------------------------|--------------------------------------------------------|------------------------------------------------------------------------------------------------------------------------------------------|--------------------------|----------------------------------------------------------------------------------|------------------------------------------------|
| Korostolev 2014[40]<br><br>Russia<br><br>Study start date: 2012 | Prospective cohort<br><br>Number of centres: NR (Moscow private clinics) | N=1,968 included,<br>N=1,728 for NIPT.<br><br>Women with singleton pregnancies, high risk for aneuploidies, >9 weeks' gestation.<br><br>Mean age (range): 34.4 (26-45) years.<br><br>Mean gestational age (range): 14 (9-33) weeks.<br><br>1 <sup>st</sup> trimester: "about 50%". | N=240 (12.2%):<br><br>Ultrasound abnormality (increased NT, heart defects, malformations, foetal growth retardation) or presence of balanced chromosomal rearrangements in the parents. | T21, T18, T13                          | Mixed risk:<br><br>High risk result of combined FTS 87%,<br><br>AMA $\geq$ 35 years only or women's will without any risk of chromosomal pathology 13%. | SNP and NATUS<br><br>Panorama<br><br>Natera Inc. (USA) | Invasive prenatal diagnosis with karyotyping or CMA (n=57),<br><br>phenotypic newborn assessment (n=624), TOP and molecular study (n=1). | None                     | NIPT and/or invasive test based on CMA for chromosomal abnormalities diagnostics | Accuracy of NIPT                               |
| Lau 2012[24]<br><br>Hong Kong, China, Japan                     | Prospective cohort                                                       | N=108<br><br>Pregnant women undergoing CVS or amniocentesis                                                                                                                                                                                                                        | NR                                                                                                                                                                                      | T21, T18, T13                          | Mostly high risk: Positive 1 <sup>st</sup> trimester screening 47.2%,                                                                                   | MPS (whole genome)                                     | Conventional karyotyping from                                                                                                            | None                     | Diagnostic accuracy of novel z-score method with internal                        | Accuracy of NIPT                               |

| Reference                                                                      | Study design                                   | Participants                                                                                                                                                                                        | Exclusions from study | Trisomies investigated (T21, T18, T13) | Prior risk                                                                                                                                                     | Type of test                                                   | Reference method                                                                                    | Comparator if applicable | Primary / secondary outcome                                                                                     | Accuracy of NIPT or comparison of NIPT with CT |
|--------------------------------------------------------------------------------|------------------------------------------------|-----------------------------------------------------------------------------------------------------------------------------------------------------------------------------------------------------|-----------------------|----------------------------------------|----------------------------------------------------------------------------------------------------------------------------------------------------------------|----------------------------------------------------------------|-----------------------------------------------------------------------------------------------------|--------------------------|-----------------------------------------------------------------------------------------------------------------|------------------------------------------------|
| Study start date: NR                                                           | Number of centres: 1                           | (possibly singleton pregnancies but NR).<br><br>Mean age (SD):<br>37 (4.3) years,<br><br>Median gestational age (range): 12+5 (11+4 – 28+0) weeks.<br><br>1 <sup>st</sup> trimester: 97 (89.8%)     |                       |                                        | positive 1 <sup>st</sup> trimester sonographic markers 22.2%,<br><br>other structural anomalies 1.5%,<br><br>previous T21 0.9%,<br><br>maternal anxiety 11.1%. | BGI-Shenzhen (China)                                           | CVS (94.4%) or amniocentesis (5.6%)                                                                 |                          | reference chromosome.                                                                                           |                                                |
| Lau 2014[25]<br><br>Hong Kong, USA, China<br><br>Study start date: August 2011 | Prospective cohort<br><br>Number of centres: 1 | N=1,982<br><br>(1,929 singleton, 30 twin pregnancies, 23 internal control samples)<br><br>Any pregnant women ≥12 weeks of gestation accepted for NIPT, regardless of whether they had undergone any | NR                    | T21, T18 T13                           | Prenatal diagnosis centre accepted referral of any pregnant woman for NIPT:<br><br>Previous trisomy / Family history<br><br>53 (2.7%).                         | MPS (whole genome)<br><br>NIFTY test<br><br>BGI-Health (China) | Conventional karyotyping from<br><br>CVS or amniocentesis, postnatal karyotyping or birth phenotype | None                     | Test accuracy for common autosomal trisomies, sex chromosomal abnormalities and other chromosome abnormalities. | Accuracy of NIPT                               |

| Reference | Study design | Participants                                                                                                                                                                                                                                                 | Exclusions from study | Trisomies investigated (T21, T18, T13) | Prior risk                                                                                                                                                                                                        | Type of test | Reference method | Comparator if applicable | Primary / secondary outcome | Accuracy of NIPT or comparison of NIPT with CT |
|-----------|--------------|--------------------------------------------------------------------------------------------------------------------------------------------------------------------------------------------------------------------------------------------------------------|-----------------------|----------------------------------------|-------------------------------------------------------------------------------------------------------------------------------------------------------------------------------------------------------------------|--------------|------------------|--------------------------|-----------------------------|------------------------------------------------|
|           |              | <p>previous T21 screening.</p> <p>Mean age (SD), range: 36 (4.35), 20-46 years.</p> <p>Median gestational age: 14.5 weeks.</p> <p>1<sup>st</sup> trimester: 56.25%.</p> <p>Ethnicity:</p> <p>Chinese 90.91%,</p> <p>Caucasian 5.21%,</p> <p>Other 3.88%.</p> |                       |                                        | <p>No prior screening test: 669 (34.2%).</p> <p>Prior screening test 1,290 (65.8%):</p> <p>High risk 593/1,290 (46.0%),</p> <p>Low risk 368/1,290 (28.5%),</p> <p>Result not available yet 329/1,290 (25.5%).</p> |              |                  |                          |                             |                                                |

| Reference                                                       | Study design                                   | Participants                                                                                                                                                                                                                                  | Exclusions from study                        | Trisomies investigated (T21, T18, T13) | Prior risk                                                                                                                                                                                                                                                             | Type of test                                     | Reference method                                                                          | Comparator if applicable                                                      | Primary / secondary outcome                                                                              | Accuracy of NIPT or comparison of NIPT with CT |
|-----------------------------------------------------------------|------------------------------------------------|-----------------------------------------------------------------------------------------------------------------------------------------------------------------------------------------------------------------------------------------------|----------------------------------------------|----------------------------------------|------------------------------------------------------------------------------------------------------------------------------------------------------------------------------------------------------------------------------------------------------------------------|--------------------------------------------------|-------------------------------------------------------------------------------------------|-------------------------------------------------------------------------------|----------------------------------------------------------------------------------------------------------|------------------------------------------------|
| Liang 2013[26]<br><br>China<br><br>Study start date: March 2009 | Prospective cohort<br><br>Number of centres: 3 | N=435<br><br>High-risk pregnant women scheduled for invasive prenatal diagnostics.<br><br>Mean age (SD):<br><br>31 (5.9) years.<br><br>Median gestational age (range): 21+3 (11+3 – 39+3) weeks.<br><br>1 <sup>st</sup> trimester: 1 (0.23%). | NR                                           | T21, T18<br>T13                        | All high risk:<br><br>AMA ( $\geq 35$ years)<br><br>84 (19.3%),<br><br>Positive serum screening<br><br>217 (49.9%),<br><br>Ultrasound abnormality<br><br>67 (15.4%),<br><br>Prior aneuploidy pregnancy<br><br>4 (0.9%),<br><br>Multiple indications<br><br>63 (14.5%). | MPS (whole genome)<br><br>Berry Genomics (China) | CVS (0.92%), cordocentesis (22.30%) or amniocentesis (76.78%) and full foetal karyotyping | None                                                                          | Test accuracy for detection of foetal aneuploidies for all 24 chromosomes in one single sequencing event | Accuracy of NIPT                               |
| Nicolaides 2012[27]<br><br>UK                                   | Retrospective cohort of stored samples         | N=2,230 original cohort,<br><br>N=2,049 eligible                                                                                                                                                                                              | N=181 (8.1%):<br><br>74 no foetal karyotype, | T21, T18                               | General obstetric population undergoing first-trimester screening for                                                                                                                                                                                                  | DANSR FORTE                                      | 86 (4.2%) CVS or amniocentesis and foetal                                                 | First-trimester CT (free $\beta$ -hCG, PAPP-A, NT) with or without additional | 1)<br><br>Performance of screening by NIPT for                                                           | Comparison of NIPT with CT                     |

| Reference                      | Study design         | Participants                                                                                                                                                                                                                                                                                                                                                                       | Exclusions from study                                                                                                                                  | Trisomies investigated (T21, T18, T13) | Prior risk                                                                                                                                                                                                                                                                         | Type of test                                                 | Reference method                                                        | Comparator if applicable                                                                                                                                                   | Primary / secondary outcome                                                                                                                                                               | Accuracy of NIPT or comparison of NIPT with CT |
|--------------------------------|----------------------|------------------------------------------------------------------------------------------------------------------------------------------------------------------------------------------------------------------------------------------------------------------------------------------------------------------------------------------------------------------------------------|--------------------------------------------------------------------------------------------------------------------------------------------------------|----------------------------------------|------------------------------------------------------------------------------------------------------------------------------------------------------------------------------------------------------------------------------------------------------------------------------------|--------------------------------------------------------------|-------------------------------------------------------------------------|----------------------------------------------------------------------------------------------------------------------------------------------------------------------------|-------------------------------------------------------------------------------------------------------------------------------------------------------------------------------------------|------------------------------------------------|
| Study start date: October 2010 | Number of centres: 1 | <p>cases.</p> <p>Women with singleton pregnancies attending for first-trimester combined screening for aneuploidies and ultrasound (general obstetric population).</p> <p>Median age (IQR): 31.8 (27.7 – 35.4) years,</p> <p>Gestational age, range: 11+0 – 13+6 weeks,</p> <p>1<sup>st</sup> trimester: 100%.</p> <p>Ethnicity:</p> <p>Caucasian 69.8%,</p> <p>African 20.6%,</p> | <p>7 abnormal karyotype other than T21 or T18,</p> <p>29 inadequate sample volume,</p> <p>1 wrongly labelled</p> <p>70 lab mixed samples together.</p> |                                        | <p>aneuploidies as part of their routine antenatal care.</p> <p>All had 1<sup>st</sup>-trimester combined test:</p> <p>Median estimated T21 risk (range)</p> <p>1:8,469</p> <p>(1:2–1:23,527),</p> <p>Median estimated T18 risk (range)</p> <p>1:14,894</p> <p>(1:2-1:47,472).</p> | <p>Harmony Prenatal Test</p> <p>Ariosa Diagnostics (USA)</p> | <p>karyotyping.</p> <p>1963 (95.8%) phenotypic newborn examination.</p> | <p>ultrasound markers (nasal bone, tricuspid regurgitation, reversed a-wave in ductus venosus).</p> <p>Risk threshold <math>\geq 1:150</math> (0.67%) for T21 and T18.</p> | <p>trisomies 21 and 18.</p> <p>2)</p> <p>Comparison of NIPT with detection rate and false positive rate of 1<sup>st</sup>-trimester CT with or without additional ultrasound markers.</p> |                                                |

| Reference                                                 | Study design                                   | Participants                                                                                                                                                                                                                                                                         | Exclusions from study | Trisomies investigated (T21, T18, T13) | Prior risk                                                                                                                                                                                                                                                                   | Type of test                            | Reference method    | Comparator if applicable | Primary / secondary outcome                                     | Accuracy of NIPT or comparison of NIPT with CT |
|-----------------------------------------------------------|------------------------------------------------|--------------------------------------------------------------------------------------------------------------------------------------------------------------------------------------------------------------------------------------------------------------------------------------|-----------------------|----------------------------------------|------------------------------------------------------------------------------------------------------------------------------------------------------------------------------------------------------------------------------------------------------------------------------|-----------------------------------------|---------------------|--------------------------|-----------------------------------------------------------------|------------------------------------------------|
|                                                           |                                                | South Asian 4.0%,<br>East Asian 2.8%,<br>Mixed 2.8%.                                                                                                                                                                                                                                 |                       |                                        |                                                                                                                                                                                                                                                                              |                                         |                     |                          |                                                                 |                                                |
| Nicolaides 2013[28]<br><br>UK<br><br>Study start date: NR | Prospective cohort<br><br>Number of centres: 1 | N=242<br><br>Women with singleton pregnancies undergoing CVS at 11-13 weeks' gestation, ≥ 18 years, ≥ 10 weeks gestation.<br><br>Mean age (range): 35.7 (18.5- 46.5) years.<br><br>Median gestational age (range): 13.1 (11.3 – 13.9) weeks.<br><br>1 <sup>st</sup> trimester: 100%. | NR                    | T21, T18, T13                          | High risk for aneuploidies or sickle cell disease:<br><br>1 <sup>st</sup> -trimester CT >1:300<br><br>227 (93.8%),<br><br>AMA 5 (2.1%),<br><br>Previous aneuploidy pregnancy<br><br>6 (2.5%),<br><br>Sickle cell testing 4 (1.7%).<br><br>Median estimated risk for T21, T18 | SNP- and NATUS<br><br>Natera Inc. (USA) | CVS and karyotyping | None                     | Performance of NIPT to detect T21, T18, T13, SCA and triploidy. | Accuracy of NIPT                               |

| Reference                                                                            | Study design                                                                           | Participants                                                                                                                                                                                                                                                                                                  | Exclusions from study                                                                                                                                                                                                                                             | Trisomies investigated (T21, T18, T13) | Prior risk                                                                        | Type of test                                                              | Reference method                                                      | Comparator if applicable | Primary / secondary outcome                                                                                                                        | Accuracy of NIPT or comparison of NIPT with CT |
|--------------------------------------------------------------------------------------|----------------------------------------------------------------------------------------|---------------------------------------------------------------------------------------------------------------------------------------------------------------------------------------------------------------------------------------------------------------------------------------------------------------|-------------------------------------------------------------------------------------------------------------------------------------------------------------------------------------------------------------------------------------------------------------------|----------------------------------------|-----------------------------------------------------------------------------------|---------------------------------------------------------------------------|-----------------------------------------------------------------------|--------------------------|----------------------------------------------------------------------------------------------------------------------------------------------------|------------------------------------------------|
|                                                                                      |                                                                                        |                                                                                                                                                                                                                                                                                                               |                                                                                                                                                                                                                                                                   |                                        | or T13 by CT (range):<br><br>1:75<br><br>(1:2–1:12,433).                          |                                                                           |                                                                       |                          |                                                                                                                                                    |                                                |
| Norton 2012[29]<br><br>USA, Netherlands, Sweden<br><br>Study start date: August 2010 | Prospective, multicentre cohort study<br><br>(NICE study)<br><br>Number of centres: 48 | N=4,002 enrolled,<br><br>N=3,228 eligible:<br><br>Women ≥ 18 years, gestational age ≥ 10 weeks, with singleton pregnancy, scheduled for invasive testing for any indication.<br><br>Mean age (SD), range: 34.3 (6.4),<br><br>18-50 years.<br><br>Mean gestational age (SD), range: 16.9 (4.1), 10-38.7 weeks. | Exclusion criteria:<br><br>Multiple pregnancies, known maternal aneuploidy, active malignancy or history of metastatic cancer, already undergone CVS or amniocentesis.<br><br>N=774 (19.3%):<br><br>433 samples used for assay development.<br><br>237 failed I/E | T21, T18                               | Undergoing invasive testing for any indication<br><br>(primarily high risk women) | DANSR, FORTE<br><br>Harmony Prenatal Test<br><br>Ariosa Diagnostics (USA) | Karyotyping, FISH or QF-PCR from amniocentesis (74.7%) or CVS (25.3%) | None                     | 1) Harmony Test performance for T21 and T18 at 1% risk cutoff.<br><br>2) Foetal fraction.<br><br>Test performance at different risk cutoff values. | Accuracy of NIPT                               |

| Reference                                                             | Study design                                                                    | Participants                                                                                                                                                                                                                                                | Exclusions from study                                                                                                                                                                                                   | Trisomies investigated (T21, T18, T13) | Prior risk                                | Type of test                                                                     | Reference method                                                                                                                                                 | Comparator if applicable                                                   | Primary / secondary outcome                                                                                                                                                   | Accuracy of NIPT or comparison of NIPT with CT |
|-----------------------------------------------------------------------|---------------------------------------------------------------------------------|-------------------------------------------------------------------------------------------------------------------------------------------------------------------------------------------------------------------------------------------------------------|-------------------------------------------------------------------------------------------------------------------------------------------------------------------------------------------------------------------------|----------------------------------------|-------------------------------------------|----------------------------------------------------------------------------------|------------------------------------------------------------------------------------------------------------------------------------------------------------------|----------------------------------------------------------------------------|-------------------------------------------------------------------------------------------------------------------------------------------------------------------------------|------------------------------------------------|
|                                                                       |                                                                                 | <p>Ethnicity:</p> <p>Caucasian 49.6%,</p> <p>African American 6.4%,</p> <p>Asian 13.4% ,</p> <p>Hispanic 22.7%,</p> <p>Other 7.9%.</p>                                                                                                                      | <p>criteria,</p> <p>84 insufficient sample volume,</p> <p>20 incorrect sample labelling.</p>                                                                                                                            |                                        |                                           |                                                                                  |                                                                                                                                                                  |                                                                            |                                                                                                                                                                               |                                                |
| <p>Norton 2015[6] USA, Sweden</p> <p>Study start date: March 2012</p> | <p>Prospective multicentre cohort (NEXT study)</p> <p>Number of centres: 35</p> | <p>N=18,955 enrolled.</p> <p>N=18,510 met I/E criteria.</p> <p>Women with singleton pregnancies, ≥ 18 years of age, presenting for aneuploidy screening at 10-14 weeks of gestation (NIPT and 1<sup>st</sup>-trimester CT).</p> <p>Mean age (range): 31</p> | <p>N=450 (2.4%):</p> <p>229 did not meet inclusion criteria or met exclusion criteria,</p> <p>31 had twins discovered on NT testing,</p> <p>121 had unknown ovum-donor status,</p> <p>64 withdrew or were withdrawn</p> | T21, T18, T13                          | General obstetric population (unselected) | <p>DANSR, FORTE</p> <p>Harmony Prenatal Test</p> <p>Ariosa Diagnostics (USA)</p> | <p>Invasive prenatal testing (135 CVS, 422 amniocentesis), 52 postnatal genetic testing,</p> <p>16 testing on products of conception, all other examinations</p> | <p>First-trimester CT (cut-off ≥1:270 for T21, ≥1:150 for T18 and T13)</p> | <p>1) Area under ROC curve for T21 screening with NIPT versus standard screening.</p> <p>2) Evaluation of NIPT and standard screening to assess the risk for T18 and T13.</p> | Comparison of NIPT with CT                     |



| Reference                                                                             | Study design                                                                                                                                             | Participants                                                                                                                                                                                                                | Exclusions from study                                                                                                                                                                  | Trisomies investigated (T21, T18, T13) | Prior risk                                                                                                                                                                                                                                                               | Type of test                                  | Reference method                                     | Comparator if applicable | Primary / secondary outcome               | Accuracy of NIPT or comparison of NIPT with CT |
|---------------------------------------------------------------------------------------|----------------------------------------------------------------------------------------------------------------------------------------------------------|-----------------------------------------------------------------------------------------------------------------------------------------------------------------------------------------------------------------------------|----------------------------------------------------------------------------------------------------------------------------------------------------------------------------------------|----------------------------------------|--------------------------------------------------------------------------------------------------------------------------------------------------------------------------------------------------------------------------------------------------------------------------|-----------------------------------------------|------------------------------------------------------|--------------------------|-------------------------------------------|------------------------------------------------|
|                                                                                       |                                                                                                                                                          | (18-48) years.<br><br>Mean gestational age (range): 12.5<br><br>(10.0-14.3) weeks.<br><br>100% 1 <sup>st</sup> trimester.                                                                                                   | by investigator.                                                                                                                                                                       |                                        |                                                                                                                                                                                                                                                                          |                                               | on of the newborn.                                   |                          | Performance of NIPT in low-risk patients. |                                                |
| Palomaki 2012[52]<br><br>USA<br><br>Study start date: Trial submission 6th April 2009 | Nested case-control in a cohort<br><br>(Part of an international clinical validation study, NCT00877292).<br><br>Each pregnancy with T18 and T13 matched | N=4,664 in cohort, N=293 case-control study (62 T18, 12 T13, 219 euploid)<br><br>plus 212 T21 and 1,483 matched controls reported earlier [62].<br><br>N=1,988 for NIPT.<br><br>Singleton pregnancies at high risk for T21. | N=279/4,664 (6.0%) from cohort:<br><br>116 sample not adequate,<br><br>112 multiple gestation / foetal death,<br><br>51 no karyotype /outcome available.<br><br>N=2,397/4,385 (54.7%): | T21, T18, T13                          | High risk for T21:<br><br>1 <sup>st</sup> -trimester screening positive: 7.2%,<br><br>2 <sup>nd</sup> -trimester screening positive: 4.4%,<br><br>Integrated test positive: 10.2%,<br><br>Ultrasound anomaly: 19.5%,<br><br>AMA $\geq$ 38 years: 41.6%,<br><br>2 or more | MPS (whole genome)<br><br>Sequenom Inc. (USA) | Amniocentesis (48.5%) or CVS (51.5%) and karyotyping | None                     | Correct identification of T21, T18 & T13  | Accuracy of NIPT                               |

| Reference          | Study design                                                                                                                           | Participants                                                                                                                                                                                                                                                              | Exclusions from study                | Trisomies investigated (T21, T18, T13) | Prior risk                                                                                            | Type of test   | Reference method              | Comparator if applicable | Primary / secondary outcome                   | Accuracy of NIPT or comparison of NIPT with CT |
|--------------------|----------------------------------------------------------------------------------------------------------------------------------------|---------------------------------------------------------------------------------------------------------------------------------------------------------------------------------------------------------------------------------------------------------------------------|--------------------------------------|----------------------------------------|-------------------------------------------------------------------------------------------------------|----------------|-------------------------------|--------------------------|-----------------------------------------------|------------------------------------------------|
|                    | with 3 controls based on the gestational age, enrolment site, race, and time in freezer (within 1 month).<br><br>Number of centres: 27 | Mean age (SD): 37.2 (5.0)* years.<br><br>Median gestational age (range): 14.6 (9-22) weeks*.<br><br>1 <sup>st</sup> trimester: 52%,<br>2 <sup>nd</sup> trimester: 48%.<br><br>Ethnicity:<br><br>Caucasian 84.7%,<br><br>Black 4%,<br><br>Asian 5.4%,<br><br>Unknown 5.4%. | Not selected for case-control study. |                                        | indications:<br>12.6%,<br><br>Family history of aneuploidy: 3.4%,<br><br>Other /unknown:<br><br>1.0%. |                |                               |                          |                                               |                                                |
| Pergament 2014[30] | Prospective international multicentre cohort                                                                                           | N=1,064 enrolled,<br><br>N=1,051 for testing<br><br>(926 euploid, 67 T21,                                                                                                                                                                                                 | N=13 (1.2%):<br><br>6 triploidy,     | T21, T18, T13                          | 543 (51.0%)<br><br>High risk: abnormal serum screen, ultrasound                                       | SNP- and NATUS | Amniocentesis/CVS (44.1%) and | None                     | Performance of single-nucleotide polymorphism | Accuracy of NIPT                               |

| Reference                                            | Study design                                                  | Participants                                                                                                                                                                                                              | Exclusions from study                                                                              | Trisomies investigated (T21, T18, T13) | Prior risk                                                                                                                                             | Type of test                               | Reference method                                                                                                           | Comparator if applicable | Primary / secondary outcome                                                | Accuracy of NIPT or comparison of NIPT with CT |
|------------------------------------------------------|---------------------------------------------------------------|---------------------------------------------------------------------------------------------------------------------------------------------------------------------------------------------------------------------------|----------------------------------------------------------------------------------------------------|----------------------------------------|--------------------------------------------------------------------------------------------------------------------------------------------------------|--------------------------------------------|----------------------------------------------------------------------------------------------------------------------------|--------------------------|----------------------------------------------------------------------------|------------------------------------------------|
| USA<br><br>Study start date: NR                      | Number of centres: 36                                         | 32 T18, 14 T13, 12 Monosomy X).<br><br>Singleton pregnancies of at least 7 weeks of gestation.<br><br>Mean age (SD), range: 30.3 (7.4), 18-47 years.<br><br>Mean gestational age (SD), range: 17.0 (4.1), 7.6-40.6 weeks. | 3 foetal mosaic,<br><br>2 47,XXY,<br><br>1 47,XXX,<br><br>1 47,XYY.                                |                                        | abnormality, maternal age $\geq 35$ years.<br><br>521 (49.0%)<br><br>Low risk: maternal age < 35 years and lacking any reported high-risk indications. | Natera Inc. (USA)                          | karyotyping/FISH;<br><br>genetic testing of cord blood, buccal sample or saliva (13.2%) or products of conception (42.8%). |                          | -based test on both high- and low-risk pregnant women.                     |                                                |
| Porreco 2014[31]<br><br>USA<br><br>Study start date: | Prospective multicentre cohort (NCT00847990)<br><br>Number of | N=4,170 enrolled, N=3,430 for testing.<br><br>Singleton pregnancies, high risk for foetal aneuploidy                                                                                                                      | N=740 (17.7%):<br><br>320 insufficient sample volume,<br><br>120 outside 6h lab processing window, | T21, T18, T13                          | High risk for foetal aneuploidy:<br><br>Abnormal NT 104 (3%),<br><br>Abnormal Triple/quad screen 289                                                   | MPS (whole genome)<br><br>MaterniT21® PLUS | Amniocentesis (75.5%) or CVS (24.5%) and karyotype                                                                         | None                     | Clinical performance of MPS to test for T21, T18, T13, foetal sex and SCA. | Accuracy of NIPT                               |

| Reference      | Study design | Participants                                                                                                                                                                                                                                                                                        | Exclusions from study                                                                                                | Trisomies investigated (T21, T18, T13) | Prior risk                                                                                                                                                                                                        | Type of test         | Reference method | Comparator if applicable   | Primary / secondary outcome | Accuracy of NIPT or comparison of NIPT with CT |
|----------------|--------------|-----------------------------------------------------------------------------------------------------------------------------------------------------------------------------------------------------------------------------------------------------------------------------------------------------|----------------------------------------------------------------------------------------------------------------------|----------------------------------------|-------------------------------------------------------------------------------------------------------------------------------------------------------------------------------------------------------------------|----------------------|------------------|----------------------------|-----------------------------|------------------------------------------------|
| September 2009 | centres: 31  | <p>undergoing invasive procedure.</p> <p>Mean age (SD), range: 35.1 (5.6), 18-50 years.</p> <p>Mean gestational age (SD), range: 16.3 (3.5), 9.0-37.0 weeks.</p> <p>Ethnicity:</p> <p>White 60.1%,</p> <p>Asian 18.7%,</p> <p>Hispanic or Latino 9.9%,</p> <p>Black 4.5%,</p> <p>Multiple 5.5%.</p> | <p>270 used as lab quality control set,</p> <p>24 incomplete case report forms,</p> <p>6 no amniocentesis / CVS.</p> |                                        | <p>(8.4%),</p> <p>Abnormal ultrasound 492 (14.3%),</p> <p>AMA <math>\geq</math> 35 years 1,417 (41.3%),</p> <p>Multiple indications 929 (27.1%),</p> <p>Previous or family history of aneuploidies 98 (2.9%).</p> | Sequenom, Inc. (USA) |                  |                            |                             |                                                |
| Quezada        | Prospective  | N=2,905                                                                                                                                                                                                                                                                                             | N=NR                                                                                                                 | T21, T18,                              | No prior screening, general                                                                                                                                                                                       | DANSR,               | CVS or amniocent | First-trimester CT for T21 | 1) Numbers and              | Comparison of                                  |

| Reference                                                | Study design                       | Participants                                                                                                                                                                                                                                                                                                                                                                    | Exclusions from study | Trisomies investigated (T21, T18, T13) | Prior risk                                                                        | Type of test                                                | Reference method                                                                                             | Comparator if applicable                                                                                                 | Primary / secondary outcome                                                                                                                         | Accuracy of NIPT or comparison of NIPT with CT |
|----------------------------------------------------------|------------------------------------|---------------------------------------------------------------------------------------------------------------------------------------------------------------------------------------------------------------------------------------------------------------------------------------------------------------------------------------------------------------------------------|-----------------------|----------------------------------------|-----------------------------------------------------------------------------------|-------------------------------------------------------------|--------------------------------------------------------------------------------------------------------------|--------------------------------------------------------------------------------------------------------------------------|-----------------------------------------------------------------------------------------------------------------------------------------------------|------------------------------------------------|
| 2015[41]<br><br>UK<br><br>Study start date: October 2012 | cohort<br><br>Number of centres: 1 | <p>Women with singleton pregnancies undergoing routine first-trimester screening for the major trisomies by NIPT and by the combined test.</p> <p>Mean age (range): 36.9 (20.4–51.9) years.</p> <p>Median gestational age (range): 10+4 (10+0 -11+6) weeks.</p> <p>1<sup>st</sup> trimester: 100%.</p> <p>Ethnicity:</p> <p>Caucasian 2,570 (88.5%),</p> <p>South Asian 173</p> |                       | T13                                    | <p>obstetric population,</p> <p>AMA <math>\geq</math> 35 years 1,958 (67.4%).</p> | <p>FORTE</p> <p>Harmony</p> <p>Ariosa Diagnostics (USA)</p> | <p>esis and foetal karyotyping,</p> <p>post-mortem examination and karyotyping,</p> <p>newborn phenotype</p> | <p>(PAPP-A, free <math>\beta</math>-hCG, nuchal translucency)</p> <p>Risk threshold <math>\geq</math> 1/100 for T21.</p> | <p>concordance of results of NIPT and 1<sup>st</sup>-trimester combined screen.</p> <p>2) Discordant results between NIPT and foetal karyotype.</p> | NIPT with CT                                   |

| Reference                                                      | Study design                                                                                       | Participants                                                                                                                                                                                                                     | Exclusions from study          | Trisomies investigated (T21, T18, T13) | Prior risk                                                                                                                                                                                                                       | Type of test                                                         | Reference method                                                                             | Comparator if applicable | Primary / secondary outcome | Accuracy of NIPT or comparison of NIPT with CT |
|----------------------------------------------------------------|----------------------------------------------------------------------------------------------------|----------------------------------------------------------------------------------------------------------------------------------------------------------------------------------------------------------------------------------|--------------------------------|----------------------------------------|----------------------------------------------------------------------------------------------------------------------------------------------------------------------------------------------------------------------------------|----------------------------------------------------------------------|----------------------------------------------------------------------------------------------|--------------------------|-----------------------------|------------------------------------------------|
|                                                                |                                                                                                    | (6.0%),<br><br>East Asian 96 (3.3%),<br><br>Afro-Caribbean 21 (0.7%),<br><br>Mixed 45 (1.5%).                                                                                                                                    |                                |                                        |                                                                                                                                                                                                                                  |                                                                      |                                                                                              |                          |                             |                                                |
| Sago 2014[42]<br><br>Japan<br><br>Study start date: April 2013 | Prospective multicentre cohort<br><br>Number of centres: 15 in April 2013,<br><br>37 by March 2014 | N=7,740<br><br>Women with singleton pregnancies, 10 to 18 weeks' gestation, high-risk for aneuploidy, requesting NIPT.<br><br>Mean age (range): 38.3 (21-48) years.<br><br>Mean gestational age (range): 13.3 (10.0-19.9) weeks. | Multiple Pregnancy<br><br>N=NR | T21, T18, T13                          | All high-risk:<br><br>Maternal age $\geq 35$ years 7387 (95.4%),<br><br>Prior history 226 (2.9%),<br><br>Ultrasound abnormality 108 (1.4%),<br><br>Serum marker 16 (0.2%),<br><br>Balanced Robertsonian translocation 3 (0.04%). | MPS (whole genome)<br><br>MaterniT21 PLUS<br><br>Sequenom Inc. (USA) | CVS or amniocentesis and foetal karyotyping, foetal death and karyotyping or birth phenotype | None                     | PPV for T21, T18 and T13.   | Accuracy of NIPT                               |



| Reference                                                             | Study design                                    | Participants                                                                                                                                                                                                                   | Exclusions from study                                         | Trisomies investigated (T21, T18, T13) | Prior risk                                                                                                                                                                                      | Type of test                                     | Reference method                               | Comparator if applicable | Primary / secondary outcome                                                            | Accuracy of NIPT or comparison of NIPT with CT |
|-----------------------------------------------------------------------|-------------------------------------------------|--------------------------------------------------------------------------------------------------------------------------------------------------------------------------------------------------------------------------------|---------------------------------------------------------------|----------------------------------------|-------------------------------------------------------------------------------------------------------------------------------------------------------------------------------------------------|--------------------------------------------------|------------------------------------------------|--------------------------|----------------------------------------------------------------------------------------|------------------------------------------------|
|                                                                       |                                                 | 5.2% multi-ethnic<br><br>Selected for training set: 71/435,<br><br>Selected for validation set: 48/575.                                                                                                                        |                                                               |                                        |                                                                                                                                                                                                 |                                                  |                                                |                          |                                                                                        |                                                |
| Shaw 2014[32]<br><br>Taiwan, China<br><br>Study start date: June 2012 | Prospective cohort<br><br>Number of centres: 11 | N=201<br><br>Pregnant women > 12 weeks' gestation.<br><br><u>High risk</u> (n=100):<br><br>Mean age (SD):<br><br>35.1 (3.2) years.<br><br>Mean gestational age (SD) 17.3 (2.1) weeks.<br><br>98 singleton, 2 twin pregnancies. | N=1 (0.5%):<br><br>1 due to early gestational age (<12 weeks) | T21, T18, T13                          | Very high risk<br><br>(T21 risk >1:30 or NT >3.0mm):<br>N=100<br><br>Average screening risk:<br>1:22.8.<br><br>Low risk<br><br>(T21 risk <1:1,500):<br><br>N=100<br><br>Average screening risk: | MPS (whole genome)<br><br>Berry Genomics (China) | Amniocentesis and karyotyping or birth outcome | None                     | Test performance for detection of all foetal autosomal and sex chromosome aneuploidies | Accuracy of NIPT                               |



| Reference                                                             | Study design                                          | Participants                                                                                                                                                               | Exclusions from study | Trisomies investigated (T21, T18, T13) | Prior risk                                                                                                                                            | Type of test                                            | Reference method                                                              | Comparator if applicable                                                                                                                                                                                  | Primary / secondary outcome                                                                                                     | Accuracy of NIPT or comparison of NIPT with CT |
|-----------------------------------------------------------------------|-------------------------------------------------------|----------------------------------------------------------------------------------------------------------------------------------------------------------------------------|-----------------------|----------------------------------------|-------------------------------------------------------------------------------------------------------------------------------------------------------|---------------------------------------------------------|-------------------------------------------------------------------------------|-----------------------------------------------------------------------------------------------------------------------------------------------------------------------------------------------------------|---------------------------------------------------------------------------------------------------------------------------------|------------------------------------------------|
|                                                                       |                                                       | <p><u>Low risk</u> (n=100):</p> <p>Mean age (SD):</p> <p>34.6 (2.6) years.</p> <p>Mean gestational age (SD) 16.1 (3.0) weeks.</p> <p>98 singleton, 2 twin pregnancies.</p> |                       |                                        | 1:3,179.                                                                                                                                              |                                                         |                                                                               |                                                                                                                                                                                                           |                                                                                                                                 |                                                |
| <p>Song 2013[33]</p> <p>China</p> <p>Study start date: April 2011</p> | <p>Prospective cohort</p> <p>Number of centres: 2</p> | <p>N=1,916</p> <p>Singleton pregnancies, women &lt;35 years undergoing routine antenatal screening.</p> <p>Mean age (SD), range: 29.03 (2.7), 20 - 34 years.</p>           | N=NR                  | T21, T18<br>T13                        | <p>General obstetric population &lt; 35 years.</p> <p>High risk</p> <p>275/1,741 (15.8%):</p> <p>Positive serum screening &gt;1:270: 249 (14.3%),</p> | <p>MPS (whole genome)</p> <p>Berry Genomics (China)</p> | <p>CVS, amniocentesis or cordocentesis and karyotyping or birth phenotype</p> | <p>2<sup>nd</sup> trimester triple serum screening</p> <p>(<math>\alpha</math>-fetoprotein, free <math>\beta</math>-hcg, unconjugated estriol)</p> <p>Cutoff <math>\geq</math> 1:270 for T21 and T18.</p> | <p>NIPT test performance for detection of T21, T18, T13 and SCA.</p> <p>Comparison of NIPT and serum screening performance.</p> | Comparison of NIPT with CT                     |

| Reference                                                           | Study design                                          | Participants                                                                                                                                                                                               | Exclusions from study                                                 | Trisomies investigated (T21, T18, T13) | Prior risk                                                                                                                    | Type of test                                            | Reference method                                                                              | Comparator if applicable | Primary / secondary outcome                                                                                                             | Accuracy of NIPT or comparison of NIPT with CT |
|---------------------------------------------------------------------|-------------------------------------------------------|------------------------------------------------------------------------------------------------------------------------------------------------------------------------------------------------------------|-----------------------------------------------------------------------|----------------------------------------|-------------------------------------------------------------------------------------------------------------------------------|---------------------------------------------------------|-----------------------------------------------------------------------------------------------|--------------------------|-----------------------------------------------------------------------------------------------------------------------------------------|------------------------------------------------|
|                                                                     |                                                       | <p>Mean gestational age (SD), range:</p> <p>16.57 (1.56),</p> <p>11 - 21+6 weeks.</p> <p>1<sup>st</sup> trimester: 3.4%,</p> <p>2<sup>nd</sup> trimester: 96.6%.</p> <p>Assisted conception 14 (0.8%).</p> |                                                                       |                                        | <p>Increased NT:</p> <p>10 (0.6%),</p> <p>Other indications</p> <p>16 (0.9%).</p> <p>Low risk</p> <p>1,466/1,741 (84.2%).</p> |                                                         |                                                                                               |                          |                                                                                                                                         |                                                |
| <p>Song 2015[45]</p> <p>China</p> <p>Study start date: May 2012</p> | <p>Prospective cohort</p> <p>Number of centres: 1</p> | <p>N=213</p> <p>Women with singleton pregnancies, <math>\geq 35</math> years, 8+0 – 12+6 weeks' gestation, high-risk of foetal aneuploidies, presenting for NIPT.</p> <p>Mean age (range):</p>             | <p>N=1 (0.5%):</p> <p>1 with quality control failure (haemolysis)</p> | T21, T18, T13                          | All high-risk for foetal aneuploidies due to advanced maternal age $\geq 35$ years.                                           | <p>MPS (whole genome)</p> <p>Berry Genomics (China)</p> | <p>CVS or amniocentesis and karyotyping (n=178) or newborn phenotypic examination (n=34).</p> | None                     | <p>1) Clinical performance of NIPT in the first trimester.</p> <p>2) Relationship between foetal DNA fraction and early gestational</p> | Accuracy of NIPT                               |

| Reference                                              | Study design                                          | Participants                                                                                                                                                                                                                                                                   | Exclusions from study | Trisomies investigated (T21, T18, T13) | Prior risk                   | Type of test                                                 | Reference method                                     | Comparator if applicable | Primary / secondary outcome                                      | Accuracy of NIPT or comparison of NIPT with CT |
|--------------------------------------------------------|-------------------------------------------------------|--------------------------------------------------------------------------------------------------------------------------------------------------------------------------------------------------------------------------------------------------------------------------------|-----------------------|----------------------------------------|------------------------------|--------------------------------------------------------------|------------------------------------------------------|--------------------------|------------------------------------------------------------------|------------------------------------------------|
|                                                        |                                                       | 37.25 (35-45) years.<br><br>Mean gestational age (range): 9+6<br><br>(8+0 – 12+6) weeks.<br><br>100% 1 <sup>st</sup> trimester.                                                                                                                                                |                       |                                        |                              |                                                              |                                                      |                          | age.                                                             |                                                |
| Sparks 2012[54]<br><br>USA<br><br>Study start date: NR | Prospective case-control<br><br>Number of centres: NR | Number enrolled unclear.<br><br>Singleton pregnancies, women $\geq$ 18 years, $\geq$ 10 weeks' gestation, high risk for foetal trisomies undergoing invasive testing.<br><br>Subset of N=338<br><br>(250 euploid, 72 T21, 16 T18) randomised into<br><br><u>Validation set</u> | NR                    | T21, T18                               | High risk for foetal trisomy | DANSR and z statistic or FORTE<br><br>Aria Diagnostics (USA) | Invasive testing with FISH and/or karyotype analysis | None                     | Detecting foetal aneuploidy using DANSR and z statistic or FORTE | Accuracy of NIPT                               |

| Reference | Study design | Participants                                                                                                                                                                                                                                                                                                                                                                 | Exclusions from study | Trisomies investigated (T21, T18, T13) | Prior risk | Type of test | Reference method | Comparator if applicable | Primary / secondary outcome | Accuracy of NIPT or comparison of NIPT with CT |
|-----------|--------------|------------------------------------------------------------------------------------------------------------------------------------------------------------------------------------------------------------------------------------------------------------------------------------------------------------------------------------------------------------------------------|-----------------------|----------------------------------------|------------|--------------|------------------|--------------------------|-----------------------------|------------------------------------------------|
|           |              | <p>(n=167)</p> <p>(36 T21, 8 T18, 123 euploid):</p> <p>Mean age (SD), range: 33.5 (7.1), 18-51 years.</p> <p>Mean gestational age (SD), range: 18.6 (4.0), 11.0-36.1 weeks.</p> <p><u>Training set</u> (n=171)</p> <p>(36 T21, 8 T18, 127 euploid):</p> <p>Mean age (SD), range: 34.5 (6.3), 18-44 years.</p> <p>Mean gestational age (SD), range: 17.6 (4.4), 10.3-33.0</p> |                       |                                        |            |              |                  |                          |                             |                                                |

| Reference                                                               | Study design                                   | Participants                                                                                                                                                                                                                                                                    | Exclusions from study                                                                       | Trisomies investigated (T21, T18, T13) | Prior risk                                                                                                                                                                                                                                                                               | Type of test                                   | Reference method                                         | Comparator if applicable | Primary / secondary outcome                                                                                                                                                           | Accuracy of NIPT or comparison of NIPT with CT |
|-------------------------------------------------------------------------|------------------------------------------------|---------------------------------------------------------------------------------------------------------------------------------------------------------------------------------------------------------------------------------------------------------------------------------|---------------------------------------------------------------------------------------------|----------------------------------------|------------------------------------------------------------------------------------------------------------------------------------------------------------------------------------------------------------------------------------------------------------------------------------------|------------------------------------------------|----------------------------------------------------------|--------------------------|---------------------------------------------------------------------------------------------------------------------------------------------------------------------------------------|------------------------------------------------|
|                                                                         |                                                | weeks.                                                                                                                                                                                                                                                                          |                                                                                             |                                        |                                                                                                                                                                                                                                                                                          |                                                |                                                          |                          |                                                                                                                                                                                       |                                                |
| Stumm 2014[34]<br><br>Germany , Switzerland<br><br>Study start date: NR | Prospective cohort<br><br>Number of centres: 5 | N=522 recruited,<br><br>N=504 for testing.<br><br>Women with singleton pregnancy, $\geq 18$ years, high risk for aneuploidies, with foetal karyotype.<br><br>Mean age (range):<br><br>36.0 (19-47) years.<br><br>Mean gestational age (range): 15.6<br><br>(11+0 – 32+1) weeks. | N=18 (3.4%):<br><br>9 no consent,<br><br>8 no karyotype,<br><br>1 sample previously tested. | T21, T18<br>T13                        | All high risk for chromosomal aberrations:<br><br>AMA >35 years 69.5%,<br><br>Positive serum markers 11.1%,<br><br>Ultrasound abnormality 39.3%,<br><br>Family history 2.1%,<br><br>Parental chromosome abnormality 0.4%,<br><br>Other 14.9%<br><br>(more than 1 risk factor in 179/522) | MPS (whole genome)<br><br>LifeCodexx (Germany) | Amniocentesis, CVS, cordocentesis and foetal karyotyping | None                     | 1) Diagnostic accuracy for foetal T21 detection (using DAP.21).<br><br>2) Diagnostic accuracy for foetal T13 and T18 detection (using DAP.plus) and comparison of algorithms for T21. | Accuracy of NIPT                               |
| Verweij                                                                 | Multicentre                                    | N=595 enrolled,                                                                                                                                                                                                                                                                 | N=75 (12.6%):                                                                               | T21                                    | 91.2% increased risk for T21 based                                                                                                                                                                                                                                                       | DANSR                                          | CVS (54%) or                                             | None                     | Test performance                                                                                                                                                                      | Accuracy                                       |

| Reference                                                                          | Study design                                                                                                    | Participants                                                                                                                                                                                                                                                                                                               | Exclusions from study                                                                                                                                                                                                                       | Trisomies investigated (T21, T18, T13) | Prior risk                                                                                                                                                                                                                                     | Type of test                                         | Reference method                                                    | Comparator if applicable | Primary / secondary outcome                                                               | Accuracy of NIPT or comparison of NIPT with CT |
|------------------------------------------------------------------------------------|-----------------------------------------------------------------------------------------------------------------|----------------------------------------------------------------------------------------------------------------------------------------------------------------------------------------------------------------------------------------------------------------------------------------------------------------------------|---------------------------------------------------------------------------------------------------------------------------------------------------------------------------------------------------------------------------------------------|----------------------------------------|------------------------------------------------------------------------------------------------------------------------------------------------------------------------------------------------------------------------------------------------|------------------------------------------------------|---------------------------------------------------------------------|--------------------------|-------------------------------------------------------------------------------------------|------------------------------------------------|
| 2013[35]<br><br>Netherlands, Norway, Sweden, USA<br><br>Study start date: May 2011 | international<br><br>prospective cohort (EU-NITE study)<br><br>Number of centres: 6<br><br>(4 Dutch, 2 Swedish) | N=520 eligible.<br><br>Women undergoing invasive testing, singleton pregnancy, $\geq 10$ weeks' gestation.<br><br>Mean age (SD), range: 36.4 (4.6), 20-47 years.<br><br>Mean gestational age (SD), range: 14.0 (2.1), 10-28 weeks.<br><br>Ethnicity:<br><br>Caucasian 84.8%,<br><br>Mediterranean 6.0%,<br><br>Asian 3.3%, | 21 failed I/E criteria (non-invasive procedure performed, twin pregnancy, no blood sample);<br><br>19 insufficient plasma volume;<br><br>11 logistical problems - shipping difficulties;<br><br>24 chromosome abnormalities other than T21. |                                        | on 1 <sup>st</sup> trimester screening (serum screening, NT and/or maternal age), detection of foetal anomalies on ultrasound, previous affected pregnancy or family history.<br><br>8.8% other indications (psychosocial or anxiety reasons). | FORTE<br><br>Harmony<br><br>Ariosa Diagnostics (USA) | amniocentesis (46%) and karyotyping or quantitative fluorescent PCR |                          | for T21 detection by shipping whole blood samples from Europe to a laboratory in the USA. | of NIPT                                        |

| Reference                                                  | Study design                                                           | Participants                                                                                                                                                                                                                                               | Exclusions from study                                                        | Trisomies investigated (T21, T18, T13) | Prior risk                                                                                                                                                                                                    | Type of test                               | Reference method                                                                                                          | Comparator if applicable | Primary / secondary outcome                                                                                                | Accuracy of NIPT or comparison of NIPT with CT |
|------------------------------------------------------------|------------------------------------------------------------------------|------------------------------------------------------------------------------------------------------------------------------------------------------------------------------------------------------------------------------------------------------------|------------------------------------------------------------------------------|----------------------------------------|---------------------------------------------------------------------------------------------------------------------------------------------------------------------------------------------------------------|--------------------------------------------|---------------------------------------------------------------------------------------------------------------------------|--------------------------|----------------------------------------------------------------------------------------------------------------------------|------------------------------------------------|
|                                                            |                                                                        | Black 1.3%,<br>Other 4.6%.                                                                                                                                                                                                                                 |                                                                              |                                        |                                                                                                                                                                                                               |                                            |                                                                                                                           |                          |                                                                                                                            |                                                |
| Wax 2015[43]<br><br>USA<br><br>Study start date: June 2012 | Retrospective review of prospective cohort<br><br>Number of centres: 1 | N=1,046 eligible for NIPT,<br><br>N=166 high-risk pregnant women with singleton pregnancies opted for NIPT.<br><br>Mean age (SD): 34.6 (5.5) years.<br><br>Gestational age: range 10+0 – 21+6 weeks.<br><br>1 <sup>st</sup> and 2 <sup>nd</sup> trimester. | Multiple pregnancy<br><br>N=NR;<br><br>N=880 (84.1%) chose not to have NIPT. | T21, T18, T13                          | All high-risk:<br><br>AMA $\geq$ 35 years 742 (70.9%),<br><br>Ultrasound abnormality 280 (26.8%),<br><br>Positive screen 115 (11.0%),<br><br>Prior trisomy 15 (1.4%),<br><br>Parental translocation 1 (0.1%). | MPS (whole genome)<br><br>Manufacturer: NR | Amniocentesis (n=56) or CVS (n=50) and karyotyping, postnatal karyotyping of neonatal blood, birth phenotype from records | None                     | Difference in genetic counselling utilisation, invasive procedures and T21 detection before and after NIPT implementation. | Accuracy of NIPT                               |

| Reference                                                                             | Study design                                                 | Participants                                                                                                                                                                                                                                                                                                                                                                             | Exclusions from study                                                                                                            | Trisomies investigated (T21, T18, T13) | Prior risk                                                                                                                                                                                                                                                                                    | Type of test                                                   | Reference method                           | Comparator if applicable | Primary / secondary outcome                                                                                                                                                                                                                                                  | Accuracy of NIPT or comparison of NIPT with CT |
|---------------------------------------------------------------------------------------|--------------------------------------------------------------|------------------------------------------------------------------------------------------------------------------------------------------------------------------------------------------------------------------------------------------------------------------------------------------------------------------------------------------------------------------------------------------|----------------------------------------------------------------------------------------------------------------------------------|----------------------------------------|-----------------------------------------------------------------------------------------------------------------------------------------------------------------------------------------------------------------------------------------------------------------------------------------------|----------------------------------------------------------------|--------------------------------------------|--------------------------|------------------------------------------------------------------------------------------------------------------------------------------------------------------------------------------------------------------------------------------------------------------------------|------------------------------------------------|
| Zhang 2015[5]<br><br>China, Hong Kong (Denmark)<br><br>Study start date: January 2012 | Prospective multicentre cohort<br><br>Number of centres: 508 | N=147,314 samples received for NIPT.<br><br>N=147,103 appropriate samples.<br><br>Women with singleton or twin pregnancy, $\geq 9$ weeks of gestation, $\geq 18$ years old.<br><br>Mean age (range): 30.9 (18-56) years.<br><br>Mean gestational age (range): 18.7 (9-37) weeks.<br><br>Trimester:<br><br>1 <sup>st</sup> (9-13 wks): 4.21%,<br><br>2 <sup>nd</sup> (14-27 wks): 94.13%, | N=211 (0.14%):<br><br>211 samples rejected due to inadequate volume, contamination, <9 gestational weeks, or improper labelling. | T21, T18, T13                          | Mixed (high-risk, low-risk or no prior screening):<br><br>Positive T21 screening 37.83%,<br><br>Negative T21 screening 21.43%,<br><br>No prior screening 40.73%.<br><br>AMA 23.04%,<br><br>Family history of aneuploidies 0.01%,<br><br>Sonographic markers of chromosomal abnormality 1.61%. | MPS (whole genome)<br><br>NIFTY test<br><br>BGI-Health (China) | Karyotyping or clinical follow-up results. | None                     | 1) Clinical performance of NIPT in detecting T21, T18, and T13.<br><br>2) NIPT performance in twin pregnancies.<br><br>NIPT performance for T21 detection in high-risk and low-risk subjects.<br><br>Factors contributing to NIPT false-positive and false-negative results. | Accuracy of NIPT                               |



| Reference                                                         | Study design                                   | Participants                                                                                                                                                                                             | Exclusions from study          | Trisomies investigated (T21, T18, T13) | Prior risk                                                                                                                                                        | Type of test                                                    | Reference method                                                                            | Comparator if applicable | Primary / secondary outcome                                                                        | Accuracy of NIPT or comparison of NIPT with CT |
|-------------------------------------------------------------------|------------------------------------------------|----------------------------------------------------------------------------------------------------------------------------------------------------------------------------------------------------------|--------------------------------|----------------------------------------|-------------------------------------------------------------------------------------------------------------------------------------------------------------------|-----------------------------------------------------------------|---------------------------------------------------------------------------------------------|--------------------------|----------------------------------------------------------------------------------------------------|------------------------------------------------|
|                                                                   |                                                | 3 <sup>rd</sup> ( $\geq 28$ wks): 1.47%,<br><br>Unknown: 0.18%.<br><br>99.45% singletons,<br>0.55% twins.                                                                                                |                                |                                        |                                                                                                                                                                   |                                                                 |                                                                                             |                          |                                                                                                    |                                                |
| Zhou 2014[44]<br><br>China<br><br>Study start date: November 2011 | Prospective cohort<br><br>Number of centres: 1 | N=7,705<br><br>Women with singleton pregnancies, 12-24 weeks' gestation, high-risk or no prior T21 screening.<br><br>Gestational age: 12-24 weeks.<br><br>1 <sup>st</sup> and 2 <sup>nd</sup> trimester. | Multiple pregnancy<br><br>N=NR | T21, T18, T13                          | Mixed risk:<br><br>AMA $\geq 35$ years: 40.4%,<br><br>High risk T21 screening: 32.1%,<br><br>Low risk T21 screening: 11.3%,<br><br>No prior T21 screening: 56.6%. | MPS (whole genome)<br><br>NIFTY test<br><br>BGI-Shenzhen, China | Amniocentesis and karyotyping (n=54), postnatal karyotype (n=2) or birth outcome (n=3,894). | None                     | 1) NIPT performance for detection of trisomies 13, 18, and 21.<br><br>2) Confirming care flow path | Accuracy of NIPT                               |
| Zimmermann 2012[55]                                               | Prospective case-control                       | N=166<br><br>(11 T21, 3 T18, 2                                                                                                                                                                           | NR                             | T21, T18 T13                           | Mixed:<br><br>Aneuploidy                                                                                                                                          | SNP-based, Parental Support (PS)                                | Invasive testing and FISH                                                                   | None                     | Detection of foetal aneuploidies                                                                   | Accuracy of NIPT                               |

| Reference                       | Study design                                                    | Participants                                                                                                                                                                                                                     | Exclusions from study | Trisomies investigated (T21, T18, T13) | Prior risk                                                                                                                                         | Type of test                       | Reference method                                                                                                                   | Comparator if applicable | Primary / secondary outcome          | Accuracy of NIPT or comparison of NIPT with CT |
|---------------------------------|-----------------------------------------------------------------|----------------------------------------------------------------------------------------------------------------------------------------------------------------------------------------------------------------------------------|-----------------------|----------------------------------------|----------------------------------------------------------------------------------------------------------------------------------------------------|------------------------------------|------------------------------------------------------------------------------------------------------------------------------------|--------------------------|--------------------------------------|------------------------------------------------|
| USA<br><br>Study start date: NR | Unblinded proof-of-principle study<br><br>Number of centres: NR | T13, 2 45X, 2 47XXY, 146 putatively euploid)<br><br>Singleton pregnancies, women $\geq$ 18 years, $\geq$ 9 weeks' gestation.<br><br>Median gestational age: 17.0 and 17.5 weeks for euploid and aneuploid samples, respectively. |                       |                                        | samples from pregnant women with invasive prenatal testing.<br><br>Putative euploid samples from average-risk women without known risk indicators. | algorithm<br><br>Natera Inc. (USA) | and/or karyotype in aneuploid samples,<br><br>62/146 putative euploid samples confirmed by karyotyping of post-birth child tissue. |                          | at chromosomes 13, 18, 21, X, and Y. |                                                |

AMA, advanced maternal age;  $\beta$ -hCG,  $\beta$ -fragment of human chorionic gonadotropin; CMA, chromosomal microarray; CT, first-trimester combined test; CVS, chorionic villus sampling; DANSR, digital analysis of selected regions; DNA, deoxyribonucleic acid; FISH, fluorescence in situ hybridisation; FORTE, Foetal fraction Optimized Risk of Trisomy Evaluation; FTS, first-trimester combined test; ICD, international classification of diseases; I/E criteria, inclusion or exclusion criteria; IQR, interquartile range; IVF, in vitro fertilisation; MPS, massively parallel sequencing; MS-AFP, maternal serum alpha-fetoprotein; NATUS, Next Generation Aneuploidy Test Using SNPs; NIFTY, Non-invasive Fetal Trisomy Test; NIPT, non-invasive prenatal testing; NPV, negative predictive value; NR, not reported; NT, nuchal translucency; PAPP-A, pregnancy-associated plasma protein; PCR, polymerase chain reaction; PPV, positive predictive value; QF-PCR, quantitative fluorescent polymerase chain reaction; ROC, receiver-operating-characteristic curve; SCA, sex chromosome anomalies; SD, standard deviation; SNP, single-nucleotide polymorphism; TOP, termination of pregnancy. \* Reviewer calculation from published data.
