# Supplementary material for: Accuracy of non-invasive prenatal testing using cell-free DNA for detection of Down, Edwards and Patau syndromes: a systematic review and meta-analysis
Source: HighWire-hosted journal article supplement (doi:10.1136/bmjopen-2015-010002), 2016-01-01
Supplement: bmjopen-2015-010002supp6.pdf [file bmjopen-2015-010002supp6.pdf]

## Supplement 6 Test characteristics by type of test

### Test characteristics – MPSS (whole genome)

| Reference                       | Blood sampling<br>(volume, time of sampling)           | Type and number of markers used                             | Sequencing platform | Multiplexing                                | Threshold                                                                                                                                         | Denominator                                                           | GC correction / repeat masked     | Human reference genome | Alignment algorithm / mismatches allowed                         |
|---------------------------------|--------------------------------------------------------|-------------------------------------------------------------|---------------------|---------------------------------------------|---------------------------------------------------------------------------------------------------------------------------------------------------|-----------------------------------------------------------------------|-----------------------------------|------------------------|------------------------------------------------------------------|
| Alberti 2015[56]<br><br>France  | 10 ml /<br>Before invasive testing                     | All fragments mapping to Chr21 (no markers)                 | Illumina HiSeq2000  | NR (10 libraries prepared at the same time) | z-score > 3 for T21, used 23 euploid pregnancies as reference set.                                                                                | Total count of unique sequences mapped in the control-sequencing run. | No / no                           | NR                     | SOAP2 / 0 mismatch                                               |
| Bianchi 2012[47]<br><br>USA     | 17 ml /<br><br>Before invasive test                    | All fragments mapping to Chr13, Chr18 or Chr21 (no markers) | Illumina HiSeq 2000 | 6-plex                                      | NCV > 4.0 aneuploid,<br><br>NCV < 2.5 euploid,<br><br>$2.5 \leq \text{NCV} \leq 4.0$ unclassified;<br><br>Used 110 independent unaffected samples | Normalizing chromosome denominators not specified                     | Normalising chr denominators / NR | hg18 (UCSC)            | Bowtie short read aligner (version 0.12.5) / $\leq 2$ mismatches |
| Bianchi 2014[19]<br><br>USA     | 10 ml /<br><br>Before or > 2 weeks after invasive test | All fragments mapping to Chr13, Chr18 or Chr21 (no markers) | Illumina HiSeq 2000 | 8-plex                                      | $\text{NCV} \geq 4.0$ affected,<br><br>$\text{NCV} \leq 3.0$ unaffected,<br><br>$3.0 < \text{NCV} < 4.0$ : resequenced in 1-plex                  | Normalising chromosome denominators not specified                     | Normalising chr denominators / NR | hg18 (UCSC)            | Bowtie short read aligner (version 0.12.5) / $\leq 2$ mismatches |
| Chen 2011[48]<br><br>Hong Kong, | 5-10 ml /<br><br>Before                                | All fragments mapping to Chr13 or                           | Genome Analyzer IIX | 2-plex                                      | z-score > 3 for T13 and T18;                                                                                                                      | Total GC-corrected read counts from a                                 | GC correction (LOESS regression)  | Hg18 NCBI.36           | Short Oligonucleotide Alignment                                  |

| Reference                                              | Blood sampling<br>(volume, time of sampling) | Type and number of markers used                       | Sequencing platform                                                                    | Multiplexing      | Threshold                                                                                                                                                                                                            | Denominator                                                                                                   | GC correction / repeat masked          | Human reference genome    | Alignment algorithm / mismatches allowed                                               |
|--------------------------------------------------------|----------------------------------------------|-------------------------------------------------------|----------------------------------------------------------------------------------------|-------------------|----------------------------------------------------------------------------------------------------------------------------------------------------------------------------------------------------------------------|---------------------------------------------------------------------------------------------------------------|----------------------------------------|---------------------------|----------------------------------------------------------------------------------------|
| Netherlands, UK, China                                 | invasive test                                | Chr18 (no markers)                                    | (Illumina)                                                                             |                   | 103 independent male euploid samples as controls                                                                                                                                                                     | sample                                                                                                        | / non-repeat masked                    |                           | Programme 2 (SOAP2); no mismatch                                                       |
| Chiu 2011[49]<br><br>Hong Kong, Netherlands, UK, China | 5-10 ml /<br><br>Before invasive test        | All fragments mapping to Chr21 (no markers)           | Genome Analyzer IIx (Illumina) for 2-plex;<br>Genome Analyzer II (Illumina) for 8-plex | 2-plex or 8-plex  | z-score > 3 for T21;<br><br>used 82 and 96 independent male euploid samples as controls for 2-plex and 8-plex, respectively                                                                                          | Total reads sequenced from a sample                                                                           | no / repeat-masked                     | NCBI Build 36, version 48 | ELAND, version 1.0 for Genome Analyzer II and version 1.4 for Genome Analyzer IIx / NR |
| Dan 2012[20]<br><br>China, Hong Kong                   | 5 ml /<br><br>Before invasive test           | All fragments mapping to chr18 and chr21 (no markers) | Illumina GAIIx or Illumina HiSeq 2000                                                  | 4-plex or 12-plex | Binary hypothesis t-test and logarithmic LR between the two t-tests (NIFTY):<br><br>t > 2.5 and L > 1: test positive,<br><br>t > 2.5 or L > 1:<br><br>test positive,<br><br>t < 2.5 and L < 1:<br><br>test negative. | Total number of unique reads.<br><br>Then normalisation by average <i>k</i> -mer coverage of the 22 autosomes | GC correction (Losses regression) / NR | hg18, NCBI build 36       | NR / 0 mismatch                                                                        |
| Ehrich                                                 | 10 ml /                                      | All fragments aligned to                              | Genome Analyzer IIx                                                                    | 4-plex            | z-score > 2.5 for T21;                                                                                                                                                                                               | All sequence reads excluding                                                                                  | no / non-repeat                        | UCSC hg19 human           | CASAVA version 1.6 / up                                                                |

| Reference                                       | Blood sampling<br>(volume, time of sampling) | Type and number of markers used                       | Sequencing platform                                           | Multiplexing                                               | Threshold                                                                                                                                                                                                                                | Denominator                                                                                                                  | GC correction / repeat masked                         | Human reference genome                          | Alignment algorithm / mismatches allowed |
|-------------------------------------------------|----------------------------------------------|-------------------------------------------------------|---------------------------------------------------------------|------------------------------------------------------------|------------------------------------------------------------------------------------------------------------------------------------------------------------------------------------------------------------------------------------------|------------------------------------------------------------------------------------------------------------------------------|-------------------------------------------------------|-------------------------------------------------|------------------------------------------|
| 2011[50]<br><br>USA                             | Before invasive test                         | Chr21 (no markers)                                    | (Illumina)                                                    | (1-plex for resequencing when foetal fraction $\leq$ 3.9%) | used 24 independent euploid reference samples; iterative censoring to adjust for biased control group                                                                                                                                    | chr X and Y                                                                                                                  | masked                                                | reference genome                                | to 1 mismatch                            |
| Huang 2014[22]<br><br>China, Denmark, Hong Kong | 5 ml /<br><br>Before invasive test           | All fragments mapping to chr18 and chr21 (no markers) | Illumina GAIIX or Illumina HiSeq 2000<br><br>(from [20])      | 4-plex or 12-plex (from [20])                              | Binary hypothesis t-test and logarithmic LR between the two t-tests (NIFTY):<br><br>$t > 2.5$ and $L > 1$ : test positive,<br><br>$t > 2.5$ or $L > 1$ : test positive (or test repeated),<br><br>$t < 2.5$ and $L < 1$ : test negative. | For k-mer coverage: Total number of unique reads.<br><br>Then normalisation by average $k$ -mer coverage of the 22 autosomes | GC correction (Losses regression) / NR                | hg18, NCBI build 36                             | NR / 0 mismatch                          |
| Jeon 2014[39]<br><br>South Korea, China         | 10 ml /<br><br>Before invasive testing       | All fragments mapping to Chr18 or Chr21 (no markers)  | Ion Proton™ System (Life Technologies, Grand Island, NY, USA) | 10-plex                                                    | z-score, all 139 euploid samples from this study used as reference group.<br><br>Interactive threshold.                                                                                                                                  | Mapped reads without denominator used for z-score calculation                                                                | Filtered by GC contents (35%-45%) / non-repeat masked | Unmasked Human reference genome sequence (hg19) | BWA / NR                                 |
| Jiang 2012[23]                                  | 5 ml /                                       | All fragments mapping to chr13, chr18                 | Illumina GAIIX and Illumina                                   | multiplex                                                  | Binary hypothesis t-test and logarithmic LR between the two t-                                                                                                                                                                           | For k-mer coverage: total number of                                                                                          | GC correction (Losses regression)                     | hg18, NCBI build 36                             | NR / 0 mismatch                          |

| Reference                                   | Blood sampling<br>(volume, time of sampling) | Type and number of markers used                              | Sequencing platform                               | Multiplexing          | Threshold                                                                                                                                                                                                              | Denominator                                                                                                                            | GC correction / repeat masked                                                                                          | Human reference genome | Alignment algorithm / mismatches allowed |
|---------------------------------------------|----------------------------------------------|--------------------------------------------------------------|---------------------------------------------------|-----------------------|------------------------------------------------------------------------------------------------------------------------------------------------------------------------------------------------------------------------|----------------------------------------------------------------------------------------------------------------------------------------|------------------------------------------------------------------------------------------------------------------------|------------------------|------------------------------------------|
| China                                       | NR                                           | and chr21 (no markers)                                       | HiSeq 2000                                        |                       | tests (NIFTY):<br><br>$ t_{ij;first}  > 3$ and<br>$ t_{ij;second}  < 3$ as warning criteria.<br>Autosomal aneuploidy if $L_{ij} > 1$ .                                                                                 | unique reads.<br><br>Then normalisation by average k-mer coverage for the 22 autosomes                                                 | / NR                                                                                                                   |                        |                                          |
| Lau 2012[24]<br><br>Hong Kong, China, Japan | 5 ml /<br><br>Before invasive test           | All fragments mapping to chr13, chr18 and chr21 (no markers) | Illumina HiSeq 2000                               | 12-plex               | z-score (with internal reference chr) $\geq 3$ for trisomy;<br><br>used 400 independent euploid samples as reference set.                                                                                              | Total number of unique reads                                                                                                           | GC correction (internal reference chromosome: Chr4 for T13,<br><br>Chr8 for T18,<br><br>Chr14 for T21) / repeat-masked | NCBI build 36.1        | ELAND /<br><br>0 mismatch                |
| Lau 2014[25]<br><br>Hong Kong, USA, China   | 5 ml /<br><br>Before invasive test           | All fragments mapping to chr13, chr18 and chr21 (no markers) | Illumina GAIx and Illumina HiSeq 2000 (from [23]) | Multiplex (from [23]) | Binary hypothesis t-test and logarithmic LR between the two t-tests (NIFTY):<br><br>$t > 2.5$ and $L > 1$ : test positive,<br>$t > 2.5$ or $L > 1$ : test positive (or test repeated),<br>$t < 2.5$ and $L < 1$ : test | For k-mer coverage: total number of unique reads.<br><br>Then normalisation by average k-mer coverage for the 22 autosomes (from [23]) | GC correction (Losses regression) / NR                                                                                 | Hg18, NCBI build 36    | NR / 0 mismatch                          |

| Reference                    | Blood sampling<br>(volume, time of sampling) | Type and number of markers used                                    | Sequencing platform | Multiplexing      | Threshold                                                                                                                                        | Denominator                                                           | GC correction / repeat masked                                                                                       | Human reference genome                       | Alignment algorithm / mismatches allowed             |
|------------------------------|----------------------------------------------|--------------------------------------------------------------------|---------------------|-------------------|--------------------------------------------------------------------------------------------------------------------------------------------------|-----------------------------------------------------------------------|---------------------------------------------------------------------------------------------------------------------|----------------------------------------------|------------------------------------------------------|
|                              |                                              |                                                                    |                     |                   | negative.<br><br>Threshold t-value NR                                                                                                            |                                                                       |                                                                                                                     |                                              |                                                      |
| Liang 2013[26]<br><br>China  | 5 ml /<br><br>Before invasive test           | All fragments mapping to chr13, chr18 and chr21 (no markers)       | Illumina HiSeq 2000 | 8-plex or 12-plex | z-score > 3 for T21,<br><br>z-score > 5.91 for T18,<br><br>z-score > 5.72 for T13;<br><br>reference set of 50 independent female euploid samples | Total count of sequences uniquely mapped to all autosomal chromosomes | GC correction (slope of simple linear regression) / non-repeat masked                                               | Unmasked human reference genome (hg19)       | SOAP2 / NR                                           |
| Palomaki 2012[52]<br><br>USA | 20-50 ml /<br><br>Before invasive test       | All fragments mapping to Chr13, Chr18 or Chr21 (no markers)        | Illumina HiSeq 2000 | 4-plex            | FC-robust z-scores $\geq 3$ for T21, T18 and T13.<br><br>Euploid pregnancies considered to be controls for each chromosome.                      | Counts for all 22 autosomes (from [62])                               | GC correction / non-repeat masked for T13 and T18, repeat-masked for T21 test and post hoc for T13 and T18 analysis | UCSC hg19 human reference genome (from [62]) | CASAVA version 1.6 /<br><br>0 mismatches (from [62]) |
| Porreco 2014[31]<br><br>USA  | 20-30 ml /<br><br>Before invasive test       | All fragments mapping to chr13, chr18, chr21, X and Y (no markers) | Illumina HiSeq 2000 | 12-plex           | FC-robust z-score $\geq 3$ for T21,<br><br>Flow cell-robust z-score $\geq 3.95$ for T18 and T13.                                                 | Counts for all 22 autosomes (from [64])                               | GC correction / repeat-masked (from [64])                                                                           | UCSC hg19                                    | Bowtie version 2 / 0 mismatch (from [64])            |

| Reference                          | Blood sampling<br>(volume, time of sampling) | Type and number of markers used                                                                               | Sequencing platform                 | Multiplexing            | Threshold                                                                                                                                                         | Denominator                                                              | GC correction / repeat masked                                             | Human reference genome            | Alignment algorithm / mismatches allowed                                        |
|------------------------------------|----------------------------------------------|---------------------------------------------------------------------------------------------------------------|-------------------------------------|-------------------------|-------------------------------------------------------------------------------------------------------------------------------------------------------------------|--------------------------------------------------------------------------|---------------------------------------------------------------------------|-----------------------------------|---------------------------------------------------------------------------------|
|                                    |                                              |                                                                                                               |                                     |                         |                                                                                                                                                                   |                                                                          |                                                                           |                                   |                                                                                 |
| Sago 2014 [42]<br><br>Japan        | 20 ml /<br>Before invasive testing           | NR<br><br><b>(MaterniT21 Plus, Sequenom:</b><br>All fragments mapping to chr13, chr18 and chr21 (no markers)) | NR<br><br>(Illumina HiSeq 2000[64]) | NR<br><br>(12-plex[64]) | NR<br><br>(Robust z-scores $z > 3$ for chromosome 21 and $z > 3.95$ for chromosomes 18 and 13[64]).                                                               | NR<br><br>(Counts for all 22 autosomes (from [64]))                      | GC correction / repeat-masked (from [64])                                 | NR<br><br>(UCSC hg19 (from [64])) | NR / NR<br><br>(Bowtie2 / Perfect matches within the seed sequence (from [64])) |
| Sehnert 2011[53]<br><br>USA        | 20 ml /<br><br>Before invasive test          | All fragments mapping to chr13, chr18 and chr21 (no markers)                                                  | Genome Analyzer IIx (Illumina)      | Monoplex                | NCV $> 4.0$ aneuploid,<br><br>NCV $< 2.5$ euploid,<br><br>$2.5 \leq \text{NCV} \leq 4.0$ unclassified;<br><br>Used independent euploid samples from training set. | Chr9 for Chr21,<br><br>Chr8 for Chr18,<br><br>Sum of Chr(2-6) for Chr13. | Normalising chr denominators / NR                                         | hg18 (UCSC)                       | Bowtie short read aligner (version 0.12.5) / $\leq 2$ mismatches                |
| Shaw 2014[32]<br><br>Taiwan, China | 5 ml /<br><br>Before invasive test           | All fragments mapping to chr13, chr18 and chr21 (no markers)                                                  | Illumina HiSeq 2000                 | 12-plex                 | z-score $> 3$ for trisomy;<br><br>Used 50 independent female euploid samples as reference set                                                                     | Total count of sequences uniquely mapped to all autosomes (from [26])    | GC correction (slope of simple linear regression[26]) / non-repeat masked | hg19                              | SOAP2 / NR                                                                      |

| Reference                                  | Blood sampling<br>(volume, time of sampling) | Type and number of markers used                              | Sequencing platform | Multiplexing        | Threshold                                                                                                                                             | Denominator                                                                           | GC correction / repeat masked                                                                                                 | Human reference genome                        | Alignment algorithm / mismatches allowed |
|--------------------------------------------|----------------------------------------------|--------------------------------------------------------------|---------------------|---------------------|-------------------------------------------------------------------------------------------------------------------------------------------------------|---------------------------------------------------------------------------------------|-------------------------------------------------------------------------------------------------------------------------------|-----------------------------------------------|------------------------------------------|
| Song 2013[33]<br><br>China                 | 5 ml /<br><br>Before invasive test           | All fragments mapping to chr13, chr18 and chr21 (no markers) | Illumina HiSeq 2000 | 12-plex             | z-score $\geq 3$ for trisomy;<br><br>Used 50 independent female euploid samples as reference set                                                      | Total count of sequences uniquely mapped to all autosomes (from [26])                 | GC correction (slope of simple linear regression[26]) / non-repeat masked                                                     | hg19                                          | BWA / NR                                 |
| Song 2015[45]<br><br>China                 | NR / Before invasive testing                 | All fragments mapping to Chr13, Chr18 or Chr21 (no markers)  | Illumina HiSeq 2000 | 12-plex (from [33]) | z-score $\geq 3$ for trisomy;<br><br>Used 50 independent female euploid samples as reference set (from [33])                                          | Total count of sequences uniquely mapped to all the autosomal chromosomes (from [26]) | GC correction (slope of simple linear regression[26]) / non-repeat masked(from [33])                                          | hg19                                          | BWA / NR (from [33])                     |
| Stumm 2014[34]<br><br>Germany, Switzerland | 7-10 ml /<br><br>Before invasive procedure   | All fragments mapping to chr13, chr18 and chr21 (no markers) | Illumina HiSeq 2000 | 12-plex             | MAD-based z-score $\geq 3$ for T21, $\geq 3.9$ for T13 and $\geq 3.2$ for T18.<br><br>1%, 2%, 4%, 10%, 20% or 40% T21 DNA control samples in each FC. | Total counts of all autosomes, X and Y                                                | DAP.21 for T21: no / repeat-masked<br><br>(after unblinding DAP.plus for T13, T18 and T21<br><br>with GC correction (LOWESS)) | DAP.21:<br><br>hg18,<br><br>DAP.plus:<br>hg19 | ELAND /<br><br>0 mismatch                |
| Wax 2015[43]<br><br>USA                    | NR / Before invasive testing                 | NR (Single commercial laboratory using MPSS)                 | NR                  | NR                  | NR                                                                                                                                                    | NR                                                                                    | NR / NR                                                                                                                       | NR                                            | NR / NR                                  |

| Reference                                        | Blood sampling<br>(volume, time of sampling) | Type and number of markers used                                          | Sequencing platform                               | Multiplexing | Threshold                                                                                                                                                                                                                        | Denominator                                                                                                          | GC correction / repeat masked                         | Human reference genome          | Alignment algorithm / mismatches allowed |
|--------------------------------------------------|----------------------------------------------|--------------------------------------------------------------------------|---------------------------------------------------|--------------|----------------------------------------------------------------------------------------------------------------------------------------------------------------------------------------------------------------------------------|----------------------------------------------------------------------------------------------------------------------|-------------------------------------------------------|---------------------------------|------------------------------------------|
| Zhang 2015[5]<br><br>China, Hong Kong, (Denmark) | 5 ml / Before invasive testing               | All fragments mapping to chr13, chr18 and chr21 (no markers)             | Illumina HiSeq2000                                | 24-plex      | A binary hypothesis t-test and logarithmic likelihood ratio L-score between the two t-tests (NIFTY) (from [20 23]).<br><br>Threshold NR                                                                                          | Total number of unique reads.<br><br>Then normalisation by average k-mer coverage of the 22 autosomes (from [20 23]) | GC correction (Losses regression) / NR (from [20 23]) | hg18, NCBI build 36             | NR / 0 mismatch (from [20 23])           |
| Zhou 2014[44]<br><br>China                       | NR / Before invasive testing                 | All fragments mapping to chr13, chr18 and chr21 (no markers) (from [20]) | Illumina GAIIx or Illumina HiSeq 2000 (from [20]) | NR           | Binary hypothesis t-test and logarithmic LR between the two t-tests (NIFTY):<br><br>$t > 2.5$ and $L > 1$ : test positive,<br><br>$t > 2.5$ or $L > 1$ : test positive,<br><br>$t < 2.5$ and $L < 1$ : test negative (from [20]) | Total number of unique reads.<br><br>Then normalisation by average k-mer coverage of the 22 autosomes (from [20])    | GC correction (Losses regression) / NR (from [20])    | hg18, NCBI build 36 (from [20]) | NR / 0 mismatch (from [20])              |

BWA, Burrows–Wheeler Aligner; Chr, chromosome; DNA, deoxyribonucleic acid; FC, flow cell; GC, guanine cytosine; LOESS / LOWESS, locally weighted scatterplot smoothing regression; LR, likelihood ratio; MAD, median absolute deviation; MPSS, massively parallel signature sequencing; NCBI,

National Centre for Biotechnology Information; NCV, normalised chromosome value; NIFTY, Non-Invasive Fetal Trisomy test; NR, not reported; SOAP, Short Oligonucleotide Alignment Program; UCSC, University of California, Santa Cruz.

#### Test characteristics - DANSR (targeted sequencing)

| Reference                                     | Blood sampling<br><br>(volume / time of sampling) | Type and number of markers used                                       | Sequencing platform                | Multiplexing           | Threshold                                                                                                                       | Denominator                                                                    | GpC correction / repeat masked                                     | Human reference genome                  | Alignment algorithm / mismatches allowed |
|-----------------------------------------------|---------------------------------------------------|-----------------------------------------------------------------------|------------------------------------|------------------------|---------------------------------------------------------------------------------------------------------------------------------|--------------------------------------------------------------------------------|--------------------------------------------------------------------|-----------------------------------------|------------------------------------------|
| Ashoor 2012[46]<br><br>UK                     | 10 ml /<br><br>Before invasive test               | 576 nonpolymorphic loci on each chr18 and chr21                       | Illumina HiSeq 2000                | 96-plex                | FORTE risk score, threshold NR                                                                                                  | Sum of mean cfDNA counts of the loci for chr18 and chr21                       | Median polish on log-transformed counts /<br><br>NA                | Expected locus sequences                | NR /<br><br><3 mismatches                |
| Bevilacqua 2015[37]<br><br>Belgium, UK, Spain | 20 ml /<br><br>Before invasive testing            | 576 nonpolymorphic loci on each chr13, chr18 and chr21 (from [21 54]) | Illumina HiSeq 2000 (from [21 54]) | 96-plex (from [21 54]) | FORTE risk score<br><br>(threshold NR, <b>Harmony<sup>TM</sup> Prenatal Test</b> usually uses FORTE risk score of 1% as cutoff) | Sum of mean cfDNA counts of the loci for chr13, chr18 and chr21 (from [21 54]) | Median polish on log-transformed counts /<br><br>NA (from [21 54]) | Expected locus sequences (from [21 54]) | NR /<br><br><3 mismatches (from [21 54]) |
| Del Mar Gil 2014[21]<br><br>UK                | 2 ml stored plasma /<br><br>NR                    | 576 nonpolymorphic loci on each chr13, chr18 and chr21                | Illumina HiSeq 2000                | 96-plex                | FORTE risk score, threshold NR                                                                                                  | Sum of mean cfDNA counts of the loci for chr13, chr18 and chr21                | Median polish on log-transformed counts /                          | Expected locus sequences                | NR /<br><br><3 mismatches                |

| Reference                                       | Blood sampling<br><br>(volume / time of sampling) | Type and number of markers used                                                                                     | Sequencing platform                | Multiplexing           | Threshold                                                              | Denominator                                                                    | GpC correction / repeat masked                                  | Human reference genome                     | Alignment algorithm / mismatches allowed |
|-------------------------------------------------|---------------------------------------------------|---------------------------------------------------------------------------------------------------------------------|------------------------------------|------------------------|------------------------------------------------------------------------|--------------------------------------------------------------------------------|-----------------------------------------------------------------|--------------------------------------------|------------------------------------------|
|                                                 |                                                   |                                                                                                                     |                                    |                        |                                                                        |                                                                                | NA                                                              |                                            |                                          |
| Nicolaides 2012[27]<br><br>UK                   | 2 ml stored plasma /<br><br>Before invasive test  | 576 nonpolymorphic loci on each chr18 and chr21                                                                     | HiSeq 2000                         | 96-plex                | FORTE risk score > 1%:<br>High risk for T18 or T21                     | Sum of mean cfDNA counts of the loci for chr18 and chr21                       | Median polish on log-transformed counts /<br><br>NA             | Expected locus sequences                   | NR /<br><br><3 mismatches                |
| Norton 2012[29]<br><br>USA, Sweden, Netherlands | 20 ml /<br><br>Before invasive test               | 576 nonpolymorphic loci on each chr18 and chr21                                                                     | Illumina HiSeq 2000                | 96-plex                | FORTE risk score > 1%:<br>High risk for T18 or T21                     | Sum of mean cfDNA counts of the loci for chr18 and chr21                       | Median polish on log-transformed counts /<br><br>NA             | Expected locus sequences                   | NR /<br><br><3 mismatches                |
| Norton 2015[6]<br><br>USA, Sweden               | NR / Before invasive testing                      | <b>Harmony™ Prenatal test:</b><br>576 nonpolymorphic loci on each chr13, chr18 and chr21 for chromosome proportion. | Illumina HiSeq 2000 (from [54])    | 96-plex (from [54])    | FORTE risk score > 1%:<br>High risk for T13, T18 or T21, respectively. | Sum of mean cfDNA counts of the loci for chr13, chr18 and chr21 (from [54])    | Median polish on log-transformed counts /<br><br>NA (from [54]) | Genome Reference Consortium human build 37 | NR /<br><br><3 mismatches (from [54])    |
| Quezada 2015[41]<br><br>UK                      | 20 ml /<br><br>Before invasive testing            | <b>Harmony™ Prenatal test:</b><br>576 nonpolymorphic loci on each                                                   | Illumina HiSeq 2000 (from [46 54]) | 96-plex (from [46 54]) | FORTE risk score (threshold NR, usually 1% cutoff).                    | Sum of mean cfDNA counts of the loci for chr13, chr18 and chr21 (from [46 54]) | Median polish on log-transformed counts /<br><br>NA (from [46   | Expected locus sequences (from [46 54])    | NR /<br><br><3 mismatches (from [46 54]) |

| Reference                                    | Blood sampling<br><br>(volume / time of sampling) | Type and number of markers used                   | Sequencing platform | Multiplexing | Threshold                                                                                                                                                                                 | Denominator                                              | GpC correction / repeat masked                      | Human reference genome   | Alignment algorithm / mismatches allowed |
|----------------------------------------------|---------------------------------------------------|---------------------------------------------------|---------------------|--------------|-------------------------------------------------------------------------------------------------------------------------------------------------------------------------------------------|----------------------------------------------------------|-----------------------------------------------------|--------------------------|------------------------------------------|
|                                              |                                                   | chr13, chr18 and chr21 for chromosome proportion. |                     |              |                                                                                                                                                                                           |                                                          | 54))                                                |                          |                                          |
| Sparks 2012[54]<br><br>USA                   | 8 ml /<br><br>NR                                  | 576 nonpolymorphic loci on each chr18 and chr21   | Illumina HiSeq 2000 | 96-plex      | Training set:<br>Standard Z-test of proportions;<br>iterative censoring on each lane of 96 samples;<br><br>z-score > 3.<br>Validation set:<br><br>FORTE risk score, threshold 1:100-1:300 | Sum of mean cfDNA counts of the loci for chr18 and chr21 | Median polish on log-transformed counts /<br><br>NA | Expected locus sequences | NR /<br><br><3 mismatches                |
| Verweij 2013[35]<br>Netherlands, Sweden, USA | 20 ml /<br><br>Before invasive test               | 576 nonpolymorphic loci on each chr18 and chr21   | Illumina HiSeq 2000 | 96-plex      | FORTE risk score > 1%:<br>High risk                                                                                                                                                       | Sum of mean cfDNA counts of the loci for chr18 and chr21 | Median polish on log-transformed counts /<br><br>NA | Expected locus sequence  | NR /<br><br><3 mismatches                |

cfDNA, cell-free deoxyribonucleic acid; Chr, chromosome; DANSR, digital analysis of selected regions; FORTE, Fetal-fraction Optimized Risk of Trisomy Evaluation; NA, not applicable; NR, not reported.

Test characteristics – Single-nucleotide polymorphism-based NIPT (with PS or NATUS algorithm)

| Reference                         | Blood sampling<br><br>(volume / time of sampling) | Type and number of markers used                                     | Sequencing platform                                              | Multiplexing                                     | Threshold                                                                                                                          | Paternal genetic sample  | GpC correction / repeat masked | Human reference genome | Alignment algorithm / mismatches allowed                                                                       |
|-----------------------------------|---------------------------------------------------|---------------------------------------------------------------------|------------------------------------------------------------------|--------------------------------------------------|------------------------------------------------------------------------------------------------------------------------------------|--------------------------|--------------------------------|------------------------|----------------------------------------------------------------------------------------------------------------|
| Hall 2014[51]<br><br>USA          | NR / NR                                           | 11,000 or 19,488 SNPs on chromosomes 21, 18, 13, X, and Y           | Illumina GAIIx or HiSeq sequencer                                | 11,000-plex or 19,488-plex targeted PCR          | NATUS: calls foetal genotype and foetal fraction with maximum likelihood, calculates copy number call accuracy, threshold NR       | yes                      | NA / NR                        | NR                     | Proprietary algorithm adapted from Novoalign (Novocraft, Selangor, Malaysia) / NR (from [55])                  |
| Korostelev 2014[40]<br><br>Russia | NR / Before invasive testing                      | >19,000 polymorphic loci covering chromosomes 21, 13, 18, X, and Y. | NR<br><br>(Illumina GAIIx or HiSeq sequencer<br><br>(from [55])) | NR<br><br>(19,488-plex targeted PCR (from [30])) | Maximum likelihood estimate generated by the NATUS algorithm combined with maternal and gestational age prior risks. Threshold NR. | NR                       | NA / NR                        | NR                     | NR / NR<br><br>(Proprietary algorithm adapted from Novoalign (Novocraft, Selangor, Malaysia) / NR (from [55])) |
| Nicolaides, 2013[28]<br><br>UK    | 20 ml /<br><br>Before invasive test               | 19,488 SNPs on chromosomes 21, 13, 18, X, and Y                     | Illumina GAIIx or HiSeq sequencer (from [55])                    | 19,488-plex targeted PCR                         | NATUS: calls foetal genotype and foetal fraction with maximum likelihood, calculates copy number call accuracy, threshold NR       | no                       | NA / NR                        | NR                     | Proprietary algorithm adapted from Novoalign (Novocraft, Selangor, Malaysia) / NR (from [55])                  |
| Pergament 2014[30]                | NR /<br><br>93% before invasive test,             | 19,488 SNPs on chromosomes 21, 13, 18, X,                           | Illumina GAIIx or HiSeq sequencer                                | 19,488-plex targeted PCR                         | NATUS: calls foetal genotype and foetal fraction with maximum likelihood,                                                          | yes for 48.1% of samples | NA / NR                        | NR                     | Proprietary algorithm adapted from Novoalign (Novocraft,                                                       |

|                                |                                                                                                |                                                 |                                   |                          |                                                                                                                           |     |         |    |                                                                                   |
|--------------------------------|------------------------------------------------------------------------------------------------|-------------------------------------------------|-----------------------------------|--------------------------|---------------------------------------------------------------------------------------------------------------------------|-----|---------|----|-----------------------------------------------------------------------------------|
| USA                            | 7% at least 4 days after                                                                       | and Y                                           | (from [55])                       |                          | calculates copy number call accuracy, threshold NR                                                                        |     |         |    | Selangor, Malaysia) / NR (from [55])                                              |
| Zimmermann 2012[55]<br><br>USA | 20-40 ml /<br><br>Putative euploid samples before, most aneuploidy samples after invasive test | 11,000 SNPs on chromosomes 21, 18, 13, X, and Y | Illumina GAIIX or HiSeq sequencer | 11,000-plex targeted PCR | PS: calls foetal genotype and foetal fraction with maximum likelihood, calculates copy number call accuracy, threshold NR | yes | NA / NR | NR | Proprietary algorithm adapted from Novoalign (Novocraft, Selangor, Malaysia) / NR |

NA, not applicable; NATUS, Next-generation Aneuploidy Test Using SNPs; NIPT, non-invasive prenatal testing; NR, not reported; PCR, polymerase chain reaction; PS, Parental Support™ algorithm; SNP, single-nucleotide polymorphism.

#### Test characteristics – other approaches

| Reference                   | Blood sampling<br><br>(volume / time of sampling) | Type and number of markers used               | Sequencing platform                                                                | Multiplexing | Threshold                                                                                                                                                             | Paternal genetic sample | Denominator (reference chromosome) | Human reference genome | Alignment algorithm / mismatches allowed |
|-----------------------------|---------------------------------------------------|-----------------------------------------------|------------------------------------------------------------------------------------|--------------|-----------------------------------------------------------------------------------------------------------------------------------------------------------------------|-------------------------|------------------------------------|------------------------|------------------------------------------|
| Dhallan 2007[57]<br><br>USA | 25-50 ml / NR                                     | 549 SNPs on chr 13;<br><br>570 SNPs on chr 21 | NA (Allelic SNP ratio: PCR followed by quantification of bands on sequencing gels) | NA           | Mean log ratio of foetal DNA between chr 13 and chr 21 significantly different (two-tailed Student's t-test allowing for unequal variances, significance level <0.05) | yes                     | Chr 13                             | NA                     | NA / NA                                  |

Chr, chromosome; DNA, deoxyribonucleic acid; NA, not applicable; NR, not reported; PCR, polymerase chain reaction; SNP, single-nucleotide polymorphism.

Test characteristics – more than one approach

| Reference                   | Blood sampling<br><br>(volume, time of sampling)                                                             | Type and number of markers used                                                                                                                                               | Sequencing platform | Multiplexing | Threshold                                                                                                                                                                                                                    | Denominator                                                                                                                            | GC correction / repeat masked | Human reference genome | Alignment algorithm / mismatches allowed |
|-----------------------------|--------------------------------------------------------------------------------------------------------------|-------------------------------------------------------------------------------------------------------------------------------------------------------------------------------|---------------------|--------------|------------------------------------------------------------------------------------------------------------------------------------------------------------------------------------------------------------------------------|----------------------------------------------------------------------------------------------------------------------------------------|-------------------------------|------------------------|------------------------------------------|
| Beamon 2014[36]<br><br>USA  | NR /<br><br>Before invasive testing                                                                          | NR<br><br>( <b>Verinata</b> and <b>Sequenom</b> commercial tests: All fragments mapping to Chr13, Chr18 or Chr21 (no markers))                                                | NR                  | NR           | <b>Verinata:</b> Normalised chromosome value<br><br>(NCV) >4.0 for autosomal aneuploidy and <2.5 for unaffected foetuses. NCV between 2.5 and 4.0 as “unclassified”.<br><br><b>Sequenom:</b> NR (Robust z-scores, cutoff NR) | NR                                                                                                                                     | NR / NR                       | NR                     | NR / NR                                  |
| Comas 2014[38]<br><br>Spain | ≤ 20 ml /<br><br>Before invasive testing<br><br><br><br><br><br><br><b>Panorama:</b><br><br>Paternal genetic | NR<br><br>( <b>Harmony test:</b> 576 nonpolymorphic loci on each chr13, chr18 and chr21.<br><b>Panorama test:</b> 19,488 polymorphic loci covering chromosomes 21, 13, 18, X, | NR                  | NR           | NR<br><br>( <b>Harmony:</b> FORTE risk score (usually 1% cutoff).<br><br><b>Panorama:</b> Maximum likelihood estimate generated by the NATUS algorithm combined with maternal and gestational age prior risks.               | NR<br><br>( <b>Harmony:</b> Sum of mean cfDNA counts of the loci for chr13, chr18 and chr21 (from [46 54])<br><br><b>Panorama:</b> NA) | NR / NR                       | NR                     | NR / NR                                  |

| Reference | Blood sampling<br>(volume, time of sampling) | Type and number of markers used | Sequencing platform | Multiplexing | Threshold      | Denominator | GC correction / repeat masked | Human reference genome | Alignment algorithm / mismatches allowed |
|-----------|----------------------------------------------|---------------------------------|---------------------|--------------|----------------|-------------|-------------------------------|------------------------|------------------------------------------|
|           | sample in 51% of samples.                    | and Y.)                         |                     |              | Threshold NR.) |             |                               |                        |                                          |

cfDNA, cell-free deoxyribonucleic acid; Chr, chromosome; NA, not applicable; NCV, normalised chromosome value; NR, not reported.
