# Supplementary material for: Accuracy of non-invasive prenatal testing using cell-free DNA for detection of Down, Edwards and Patau syndromes: a systematic review and meta-analysis
Source: HighWire-hosted journal article supplement (doi:10.1136/bmjopen-2015-010002), 2016-01-01
Supplement: bmjopen-2015-010002supp7.pdf [file bmjopen-2015-010002supp7.pdf]

**Supplement 7 Study quality according to QUADAS-2[7]**

| Study                 | Risk of bias      |            |                    |                 |                            | Applicability concerns |            |                    |
|-----------------------|-------------------|------------|--------------------|-----------------|----------------------------|------------------------|------------|--------------------|
|                       | Patient selection | Index test | Reference standard | Flow and timing | Role and impact of sponsor | Patient selection      | Index test | Reference standard |
| Alberti 2015[56]      | High              | High       | Low                | High            | Low                        | Unclear                | Low        | Low                |
| Ashoor 2012[46]       | High              | Unclear    | Low                | High            | Unclear                    | Low                    | Low        | Low                |
| Beamon 2014[36]       | High              | Low        | Low                | High            | Low                        | High                   | Low        | Low                |
| Bevilacqua 2015[37]   | Unclear           | Low        | Low                | High            | High                       | High                   | Low        | Low                |
| Bianchi 2012[47]      | High              | Low        | Low                | High            | High                       | High                   | Low        | Low                |
| *Bianchi 2014[19]     | Unclear           | Unclear    | Low                | High            | High                       | High                   | High       | Low                |
| Chen 2011[48]         | High              | Unclear    | Low                | Low             | High                       | Unclear                | Low        | Low                |
| Chiu 2011[49]         | High              | Low        | Low                | High            | High                       | High                   | Low        | Low                |
| Comas 2014[38]        | High              | Low        | Low                | High            | High                       | High                   | Low        | Low                |
| Dan 2012[63]          | Unclear           | Unclear    | Low                | High            | High                       | High                   | Low        | Low                |
| Del Mar Gil 2013 [21] | Unclear           | Unclear    | Unclear            | High            | Unclear                    | Low                    | Low        | Low                |
| Dhallan 2007[57]      | High              | Unclear    | Low                | Low             | High                       | High                   | High       | Low                |
| Ehrich 2011[50]       | High              | High       | Low                | High            | High                       | High                   | Low        | Low                |
| Hall 2014[51]         | High              | Unclear    | Low                | High            | High                       | High                   | High       | Low                |
| Huang 2014[22]        | Unclear           | Unclear    | Low                | Low             | High                       | High                   | Low        | Low                |
| Jeon 2014[39]         | Unclear           | High       | Low                | Low             | Low                        | High                   | Low        | Low                |
| Jiang 2012[23]        | Unclear           | Unclear    | Low                | Low             | High                       | High                   | Low        | Low                |

| Study                | Risk of bias      |              |                    |                 |                            | Applicability concerns |            |                    |
|----------------------|-------------------|--------------|--------------------|-----------------|----------------------------|------------------------|------------|--------------------|
|                      | Patient selection | Index test   | Reference standard | Flow and timing | Role and impact of sponsor | Patient selection      | Index test | Reference standard |
| Korostolev 2014[40]  | Unclear           | Low          | Low                | High            | Low                        | High                   | Low        | Low                |
| Lau 2012[24]         | Unclear           | Low          | Low                | Low             | Unclear                    | Low                    | Low        | Low                |
| Lau 2014[25]         | Low               | Unclear      | Low                | High            | Unclear                    | High                   | Low        | Low                |
| Liang 2013[26]       | Unclear           | Low          | Low                | High            | Low                        | High                   | Low        | Low                |
| *Nicolaidis 2012[27] | Unclear           | Low          | Low                | High            | Unclear                    | High                   | Low        | Low                |
| Nicolaidis 2013[28]  | Unclear           | Unclear      | Low                | High            | Unclear                    | Low                    | Low        | Low                |
| Norton 2012[29]      | Unclear           | Low          | Low                | High            | High                       | High                   | Low        | Low                |
| *Norton 2015[6]      | Unclear           | Low          | Low                | High            | High                       | High                   | Low        | Low                |
| Palomaki 2012[52]    | High              | High         | Low                | High            | High                       | High                   | Low        | Low                |
| Pergament 2014[30]   | Unclear           | High         | Low                | High            | High                       | High                   | Low        | Low                |
| Porreco 2014[31]     | High              | Low          | Low                | High            | High                       | High                   | Low        | Low                |
| *Quezada 2015[41]    | Unclear           | Low / High\$ | Low                | High            | Unclear                    | High                   | Low        | Low                |
| Sago 2014[42]        | High              | Low          | Low                | High            | Unclear                    | Unclear                | Low        | Low                |
| Sehnert 2011[53]     | High              | Low          | Low                | High            | High                       | High                   | Low        | Low                |
| Shaw 2014[32]        | Unclear           | Low          | Low                | Low             | Unclear                    | High                   | Low        | Low                |
| *Song 2013[33]       | Unclear           | Low          | Low                | High            | Low                        | High                   | High       | Low                |

| Study               | Risk of bias      |                                       |                    |                 |                            | Applicability concerns |            |                    |
|---------------------|-------------------|---------------------------------------|--------------------|-----------------|----------------------------|------------------------|------------|--------------------|
|                     | Patient selection | Index test                            | Reference standard | Flow and timing | Role and impact of sponsor | Patient selection      | Index test | Reference standard |
| Song 2015[45]       | Unclear           | Low                                   | Low                | High            | Unclear                    | Low                    | Low        | Low                |
| Sparks 2012[54]     | High              | High                                  | Low                | High            | High                       | High                   | Low        | Low                |
| Stumm 2014[34]      | Low               | Low for DAP.21<br>High for DAP.plus** | Low                | High            | High                       | High                   | Low        | Low                |
| Verweij 2013[35]    | Low               | Low                                   | Low                | High            | High                       | High                   | Low        | Low                |
| Wax 2015[43]        | Low               | Unclear                               | Low                | High            | Low                        | Unclear                | Low        | Low                |
| Zhang 2015[5]       | Unclear           | Unclear                               | Low                | High            | High                       | High                   | Low        | Low                |
| Zhou 2014[44]       | Unclear           | Unclear                               | Low                | High            | Unclear                    | High                   | Low        | Low                |
| Zimmermann 2012[55] | High              | High                                  | Low                | High            | High                       | High                   | High       | Low                |

\* Studies comparing NIPT with conventional screening tests for T21, T18 and T13 (addressing Research question 2)

\*\* A second algorithm was used for T18 and T13 during the study which was unblinded.

\$ In this study the combined test (as comparator) was also assessed.
